# Supplementary material for: A synthesis of a 1,1′-desymmetrised ferrocene backbone and its facile one-pot double-“click” functionalisation
Source: Royal Society of Chemistry journal article supplement (doi:10.1039/c3ra43054e), 2013-01-01
Supplement: c3ra43054e.pdf [file c3ra43054e.pdf]

## A synthesis of the 1,1'-desymmetrised ferrocene backbone and its facile one-pot double-“click” functionalisation.

Gennadiy Ilyashenko,<sup>\*a</sup> Rawan Al-Safadi,<sup>a</sup> Robert Donnan,<sup>b</sup> Rostyslav Dubrovka,<sup>b</sup> Jessica Pancholi,<sup>a</sup> Michael Watkinson,<sup>a</sup> Andrew Whiting.<sup>c</sup>

<sup>a</sup> *The Joseph Priestley Building, School of Biological and Chemical Sciences, Queen Mary University of London, Mile End Road, London, E1 4NS, UK.*

<sup>b</sup> *School of Electronic Engineering and Computer Sciences, Queen Mary University of London, Mile End Road, London, E1 4NS, UK.*

<sup>c</sup> *Chemistry Department, Science Laboratories, Durham University, South Road, Durham, DH1 3LE.*

*Gennadiy Ilyashenko; E-mail: g.ilyashenko@qmul.ac.uk*

## Experimental

### General experimental details

All reagents were purchased from Aldrich, Acros, Merck or Fluka and were used without further purification unless otherwise stated. I<sub>2</sub> was sublimed prior to use. Triisopropylborate was distilled prior to use. Hexane was dried by refluxing over CaH<sub>2</sub> for a minimum of 6 h and distilled prior to use. MeOH was stirred over silica (10% w/v) for at least 24 h under a N<sub>2</sub> atmosphere, filtered and stored over 4 Å-molecular sieves. Et<sub>3</sub>N was stored over KOH under a N<sub>2</sub> atmosphere. All other anhydrous solvents were obtained from an MBRAUN MB SPS-800 solvent purifying system. PE refers to the fraction of petroleum ether boiling in the range 40-60 °C; EA refers to ethyl acetate. All water was obtained from an Elga Purelab Option distillation system. <sup>1</sup>H-NMR spectra were recorded on Bruker Avance 600 MHz NMR spectrometer (with an auto-tuning broad-band/inverse observation probe with a Z-gradient) or a Bruker AV400 (s = singlet, d=doublet, t=triplet, q=quartet, m=multiplet). <sup>13</sup>C-NMR spectra were recorded on a 150.8 MHz Bruker Avance or a 100.2 MHz Bruker AV400. The spectra were referenced with respect to residual solvent (CHCl<sub>3</sub>). IR spectra were recorded on an Agilent Technologies Cary 630 FTIR spectrometer equipped with ATR accessory. UV-Vis spectra were obtained on a U-3020 spectrophotometer, with absorption maxima (λ<sub>max</sub>) expressed in nm, and molar extinction coefficients (ε) are expressed in Lmol<sup>-1</sup>cm<sup>-1</sup>. Mass spectra was obtained using a Waters (UK) TQD mass spectrometer (low resolution ESI+, electrospray in positive ion mode) and a Waters (UK) LCT premier XE (high resolution ESI+, electrospray in positive ion mode, ES+); or Electrospray ionisation mass spectrometry was obtained from the EPSRC National Mass Spectrometry Service, University of Wales, Swansea on a Thermofisher LTQ Orbitrap XL. Melting points were measured on a Stuart SMP3 melting point apparatus and are uncorrected. Flash column chromatography, unless otherwise stated, was performed using Fluka silica gel 60 (220-240 mesh), and TLC was carried out using pre-coated aluminium backed plates with Merck Kiesegel 60 F254. The plates were visualized under a UV lamp (254 nm), or by staining with basified aqueous KMnO<sub>4</sub> solution followed by gentle heating.

**1-bromo,1'-iodoferrocene 4:**

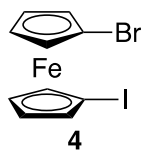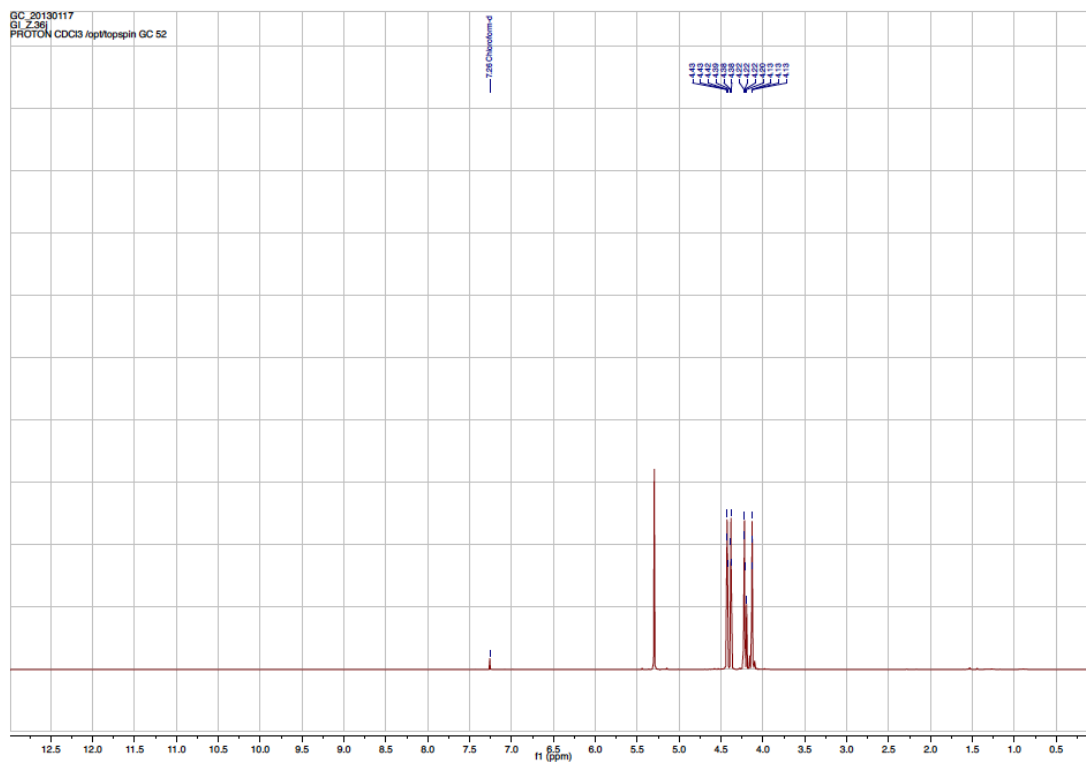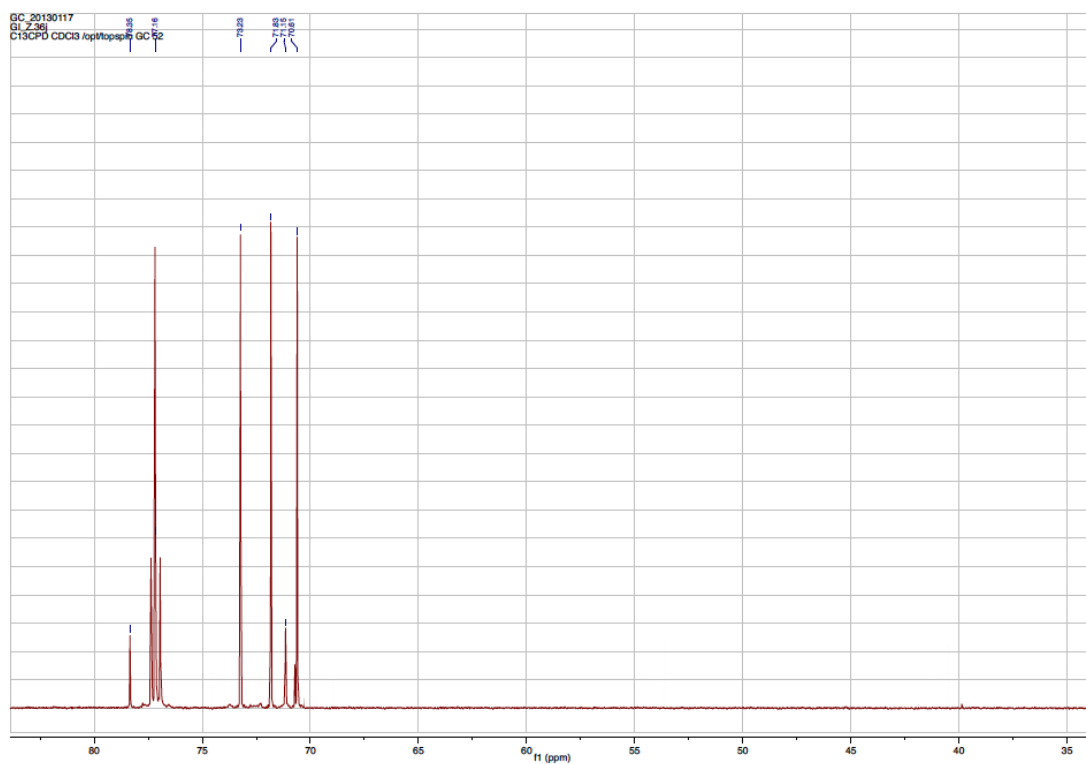

**Figure ESI 1:**  $^1\text{H}$  and  $^{13}\text{C}$  NMR spectra of **4**.

1-bromo-1'-trimethylsilyl-ethynylferrocene **5**:

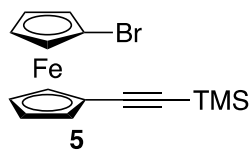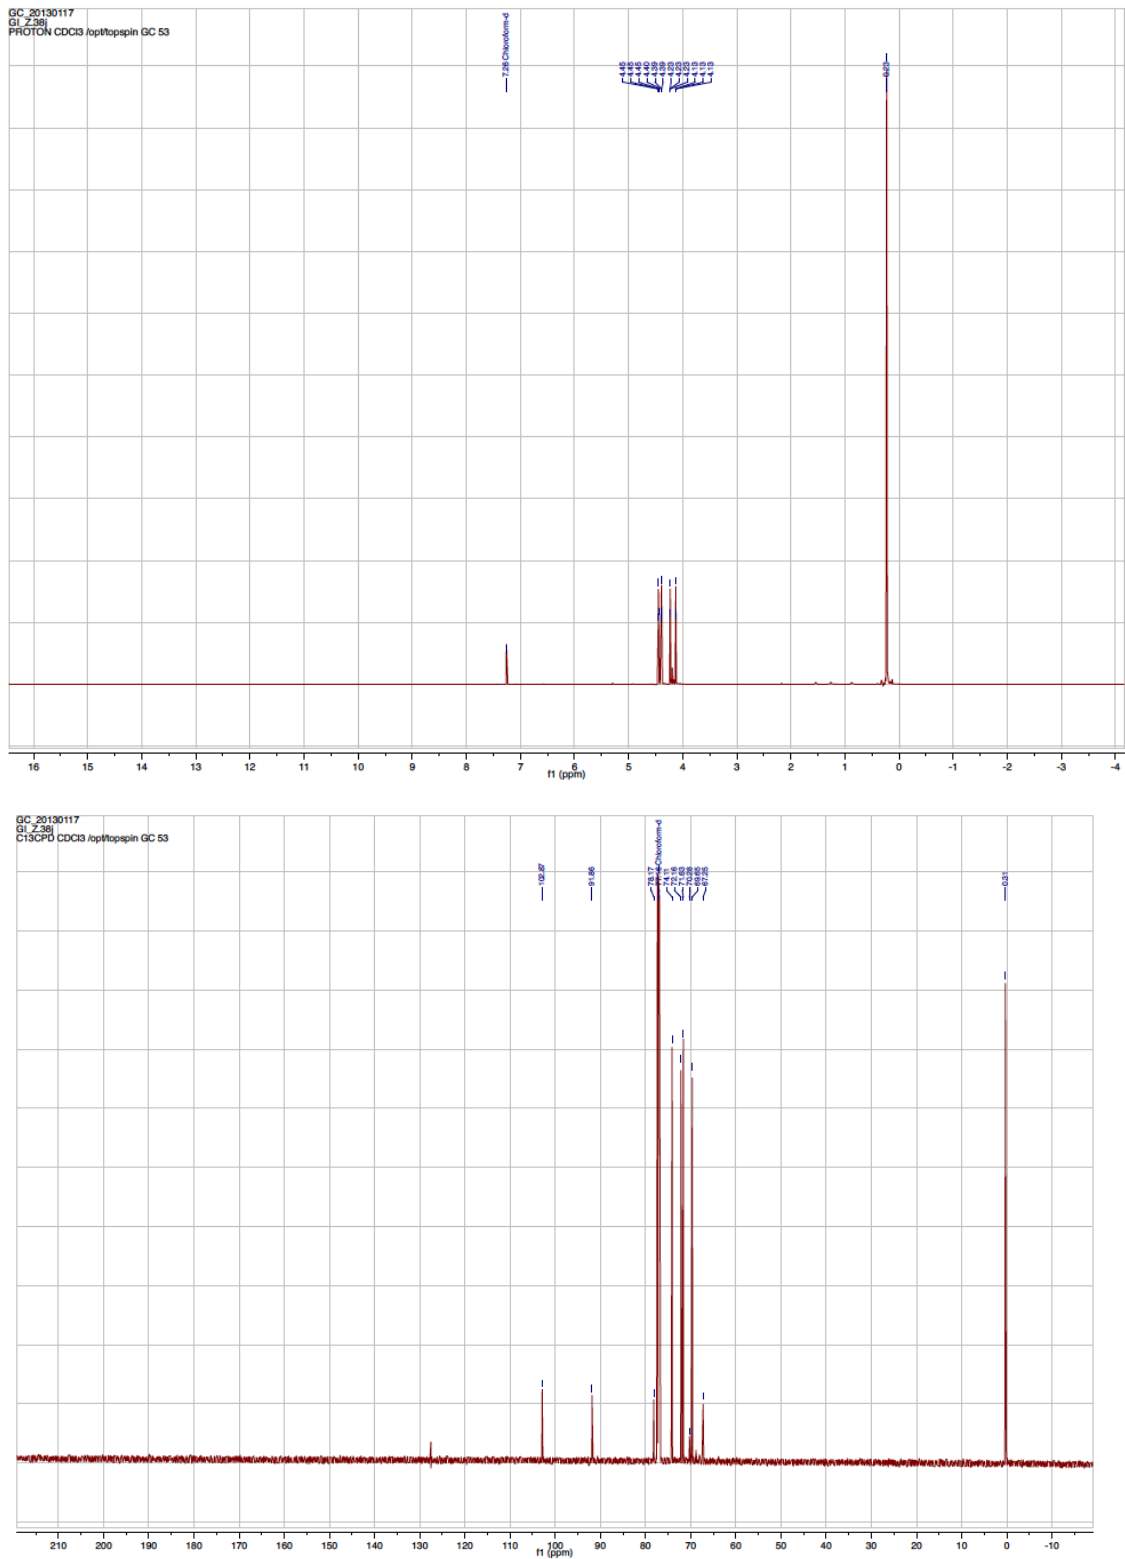

Figure ESI 2: <sup>1</sup>H and <sup>13</sup>C NMR spectra of **5**.

**1'-(1-trimethylsilylethynyl)ferroceneboronic acid 2:**

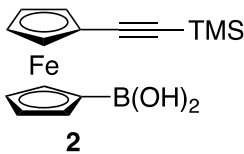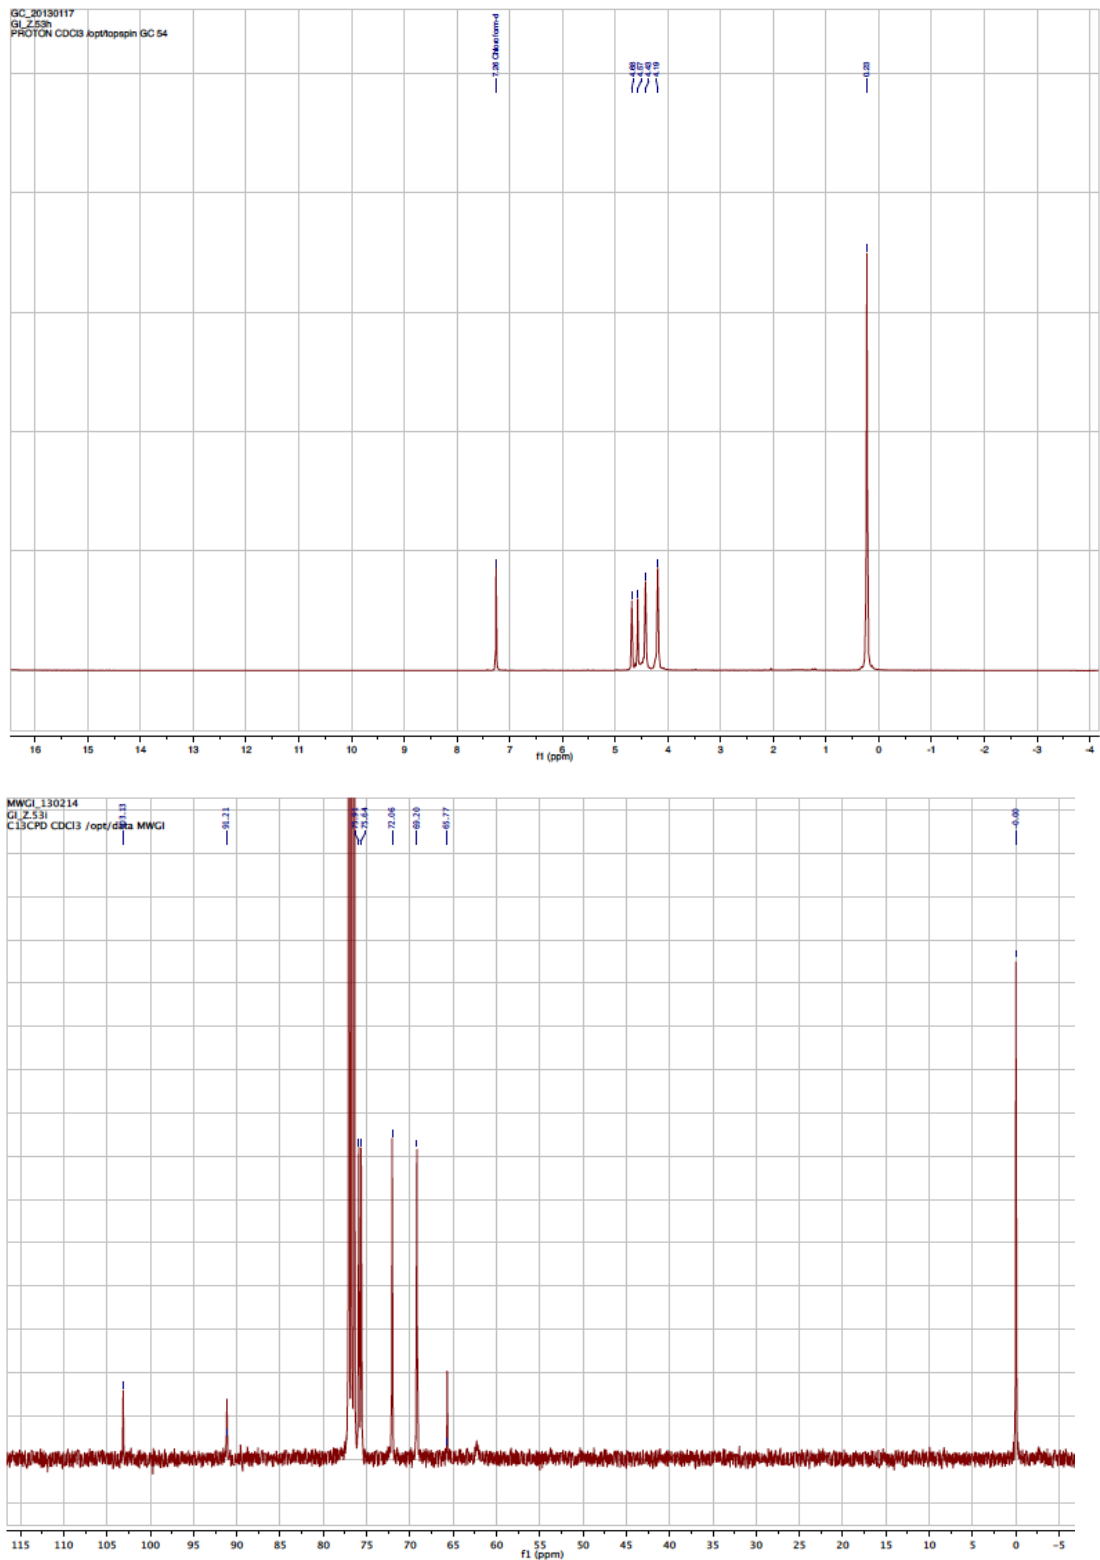

**Figure ESI 3:** <sup>1</sup>H and <sup>13</sup>C NMR spectra of **2**.

**1'-azido-(1-trimethylsilylethynyl)ferrocene 1:**

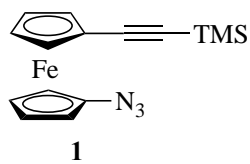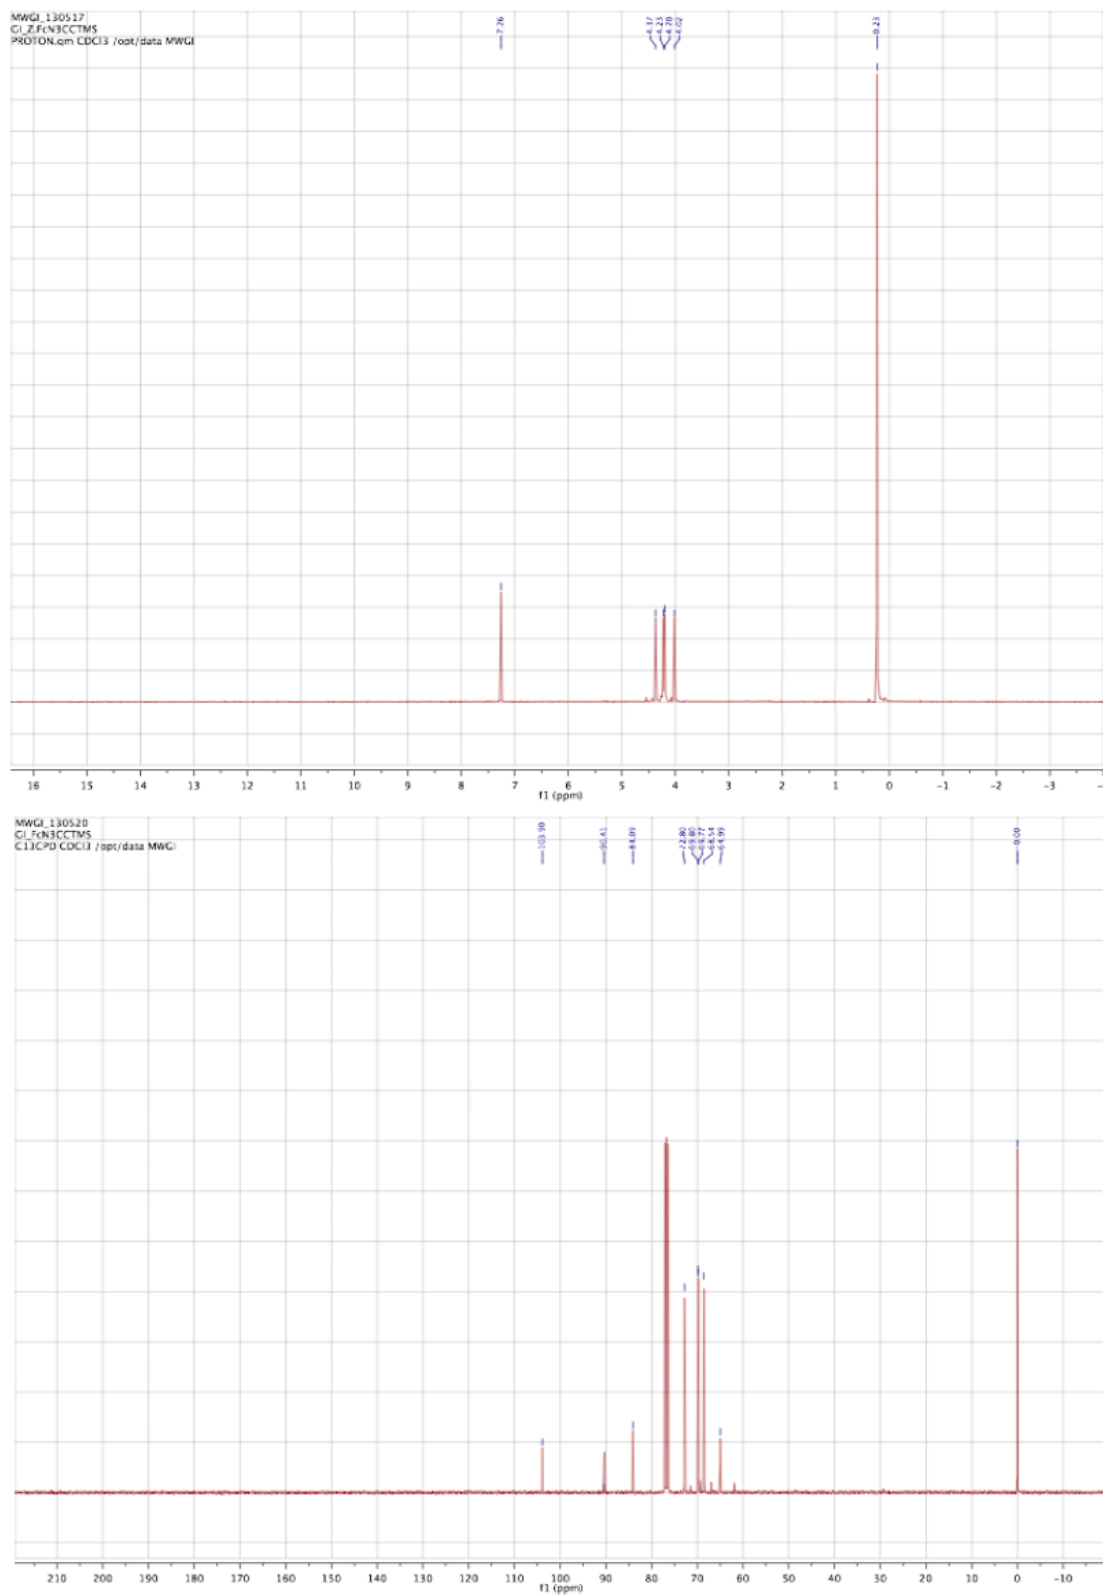

**Figure ESI 4:** <sup>1</sup>H and <sup>13</sup>C NMR spectra of **1**.

**General procedure for the conversion of boronic acid to azide and in situ cyclisation as represented by the synthesis of 1-(trimethylsilylethynyl)-1'-(4-phenyl-1H-1,2,3-triazol-1-yl)-ferrocene **8**:**

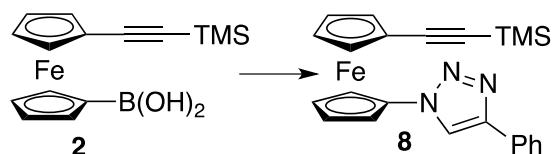

Boronic acid **2** (300 mg, 0.92 mmol, 1.0 equiv.), NaN<sub>3</sub> (60 mg, 0.93 mmol, 1.02 equiv.) and Cu(OAc)<sub>2</sub>·H<sub>2</sub>O (1.8 mg, 9.3 × 10<sup>-3</sup> mmol, 1.0 mol%) were dissolved in anhydrous MeOH (10 mL) and stirred at r.t. for 1 hour, until all of **2** was consumed (judged by TLC analysis). Phenylacetylene (103 mg, 1.01 mmol, 1.1 equiv.) was added to the reaction mixture, followed by the addition of a solution of sodium ascorbate (27 mg, 0.18 mmol, 20 mol%) in water (500 μL). The reaction mixture was stirred at r.t. for 16 h, after which it was diluted with a 1.0 M solution of EDTA in saturated NaHCO<sub>3</sub>. The crude product was extracted with DCM (3 × 10 mL). The combined organic extracts were dried over MgSO<sub>4</sub> and concentrated *in vacuo*. The final product **8** was isolated after flash column chromatography (7% EA in PE) as yellow solid (191 mg, 49%); m.p. 163-165 °C; <sup>1</sup>H NMR: 400 MHz, CDCl<sub>3</sub>: δ<sub>H</sub> 8.15 (s, 1H), 7.89 (m, 2H), 7.46 (m, 2H), 7.36 (m, 2H), 4.85 (m, 2H), 4.42 (m, 2H), 4.34 (m, 2H), 4.28 (m, 2H), 0.21 (s, 9H); <sup>13</sup>C NMR: δ<sub>C</sub> 147.9, 130.5, 129.0, 128.4, 125.9, 119.3, 102.8, 94.6, 92.4, 74.0, 71.0, 68.9, 67.0, 64.6, 0.2; IR: ν<sub>max</sub>/cm<sup>-1</sup> 3128, 3101, 2954, 2148, 1701, 1642, 1611, 1582, 1523, 1480, 1393, 1370, 1248, 1230, 1070, 1027, 925, 842, 761, 725, 694; HRMS m/z calculated for: C<sub>23</sub>H<sub>24</sub><sup>54</sup>FeN<sub>3</sub>Si [M+H]<sup>+</sup> 424.1136, found 424.1144; LRMS: m/z 426.0 [M+H]<sup>+</sup>; UV/vis: λ<sub>max</sub>(DCM)/nm (ε/ mol<sup>-1</sup>cm<sup>-1</sup>dm<sup>3</sup>) 247 (28.53 × 10<sup>3</sup>), 275 (18.04 × 10<sup>3</sup>), 294 (11.78 × 10<sup>3</sup>), 329 (2.35 × 10<sup>3</sup>), 444 (523).

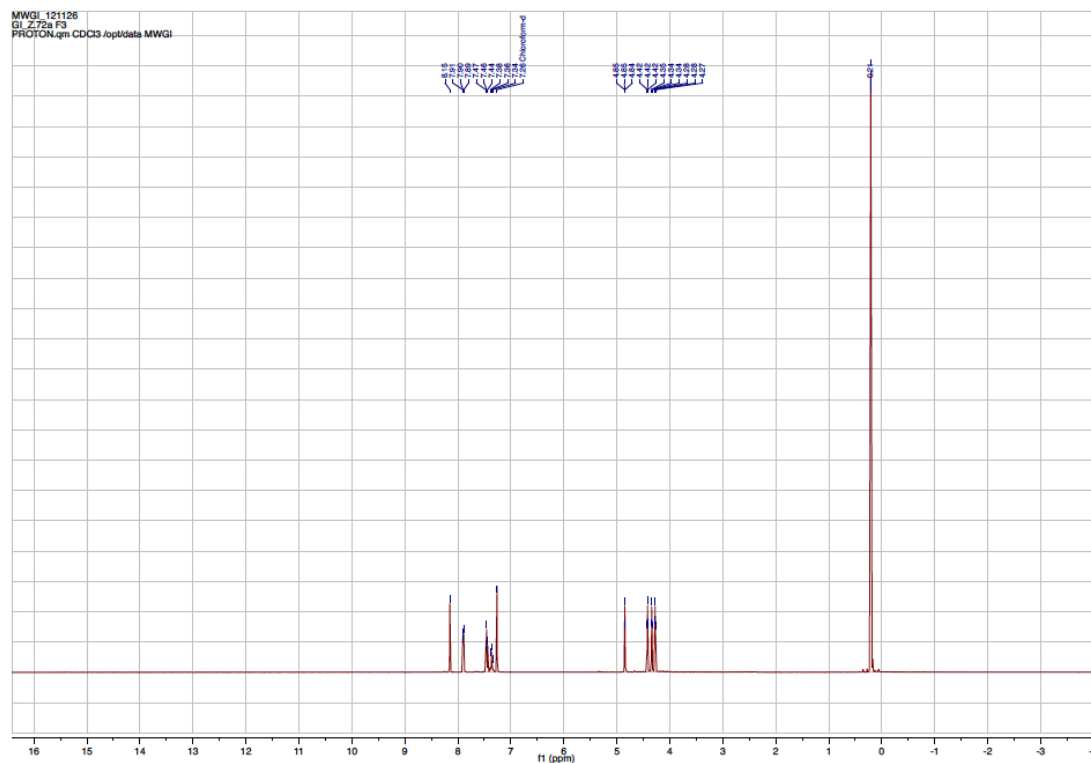

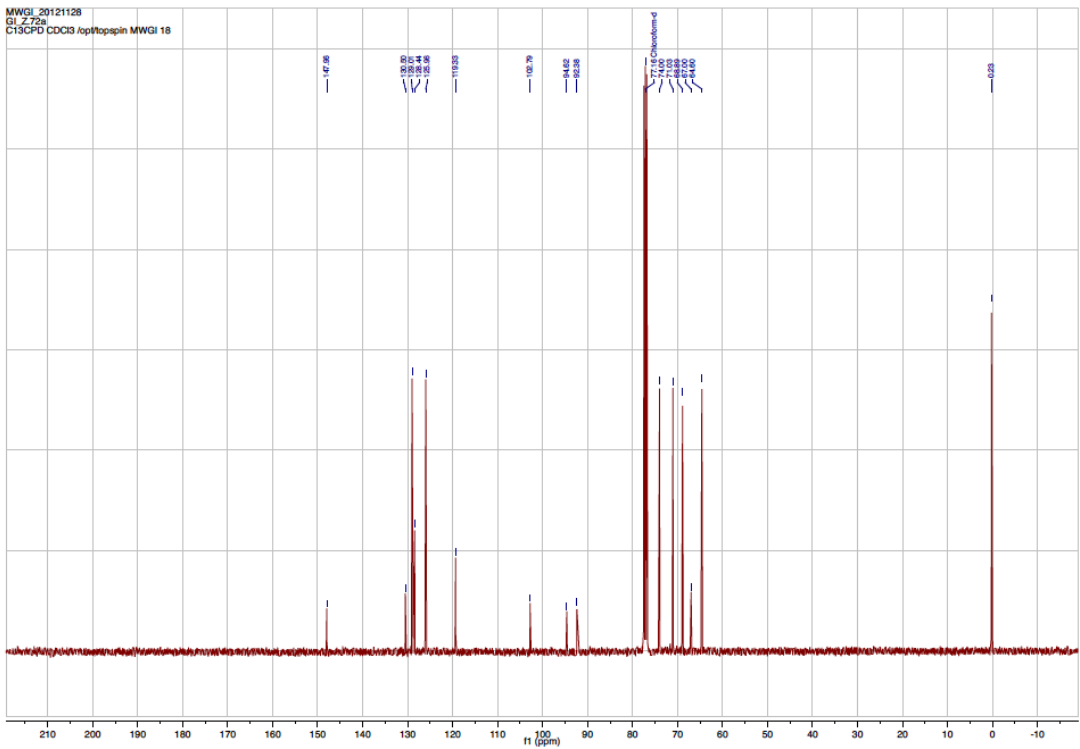

**Figure ESI 5:**  $^1\text{H}$  and  $^{13}\text{C}$  NMR spectra of **8**.

**The synthesis of 1-(trimethylsilylethynyl)-1'-(4-phenyl-1H-1,2,3-triazol-1-yl)-ferrocene **8** from azide **1**:**

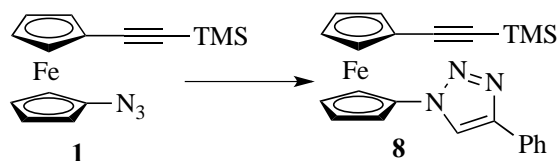

Azide **1** (12 mg, 0.036 mmol, 1.0 equiv.) and phenylacetylene (4.2 mg, 0.040 mmol, 1.1 equiv.) were dissolved in degassed MeOH (500  $\mu$ L). A solution of  $\text{CuSO}_4 \cdot 6\text{H}_2\text{O}$  (0.92 mg,  $3.7 \times 10^{-3}$  mmol, 10 mol%) in degassed water (100  $\mu$ L) was then added to the reaction mixture followed by the addition of a solution of sodium ascorbate (1.1 mg,  $5.6 \times 10^{-3}$  mmol, 15 mol%) in water (100  $\mu$ L). The reaction mixture was stirred at r.t. for 16 h, after which it was diluted with a 1.0 M solution of EDTA in saturated  $\text{NaHCO}_3$ . The crude product was extracted with DCM (3 x 10 mL). The combined organic extracts were dried over  $\text{MgSO}_4$  and concentrated *in vacuo*. The final product **8** was isolated after flash column chromatography (7% EA in PE) as yellow solid (15 mg, 95%).

**1-(Trimethylsilylethynyl)-1'-(4-hexyl-1H-1,2,3-triazol-1-yl)-ferrocene 22:**

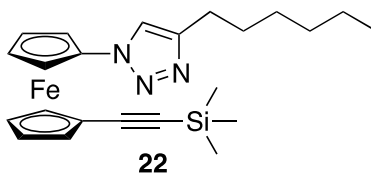

Product was isolated after flash column chromatography (10% EA in PE) as yellow solid (45%): m.p. 106-108 °C;  $^1\text{H}$  NMR: 400 MHz,  $\text{CDCl}_3$ :  $\delta_{\text{H}}$  7.68 (s, 1H), 4.75 (m, 2H), 4.35 (m, 2H), 4.29 (m, 2H), 4.23 (m, 2H), 2.75 (t,  $J = 7.8$  Hz, 2H), 1.73 – 1.68 (m, 2H), 1.42 – 1.27 (m, 6H), 0.91 – 0.86 (m, 3H), 0.23 (s, 9H);  $^{13}\text{C}$  NMR:  $\delta_{\text{C}}$  148.7, 120.5, 103.1, 94.8, 92.1, 73.9, 70.9, 68.7, 66.6, 64.6, 60.5, 31.7, 29.6, 29.1, 25.9, 22.7, 14.3, 14.2, 0.14; IR:  $\nu_{\text{max}}/\text{cm}^{-1}$  3130, 3091, 2956, 2927, 2851, 2151, 1521, 1466, 1453, 1247, 1222, 1073, 1042, 1030, 925, 885, 839, 822, 807, 759, 724; HRMS  $m/z$  calculated for:  $\text{C}_{23}\text{H}_{24}\text{FeN}_3\text{Si}$   $[\text{M}+\text{H}]^+$  434.1715, found 434.1735; LRMS:  $m/z$  434.1  $[\text{M}+\text{H}]^+$ ; UV/vis:  $\lambda_{\text{max}}(\text{DCM})/\text{nm}$  ( $\epsilon / \text{mol}^{-1}\text{cm}^{-1}\text{dm}^3$ ) 238 ( $14.41 \times 10^3$ ), 244 ( $11.98 \times 10^3$ ), 274 ( $10.11 \times 10^3$ ), 330 (703), 444 (328).

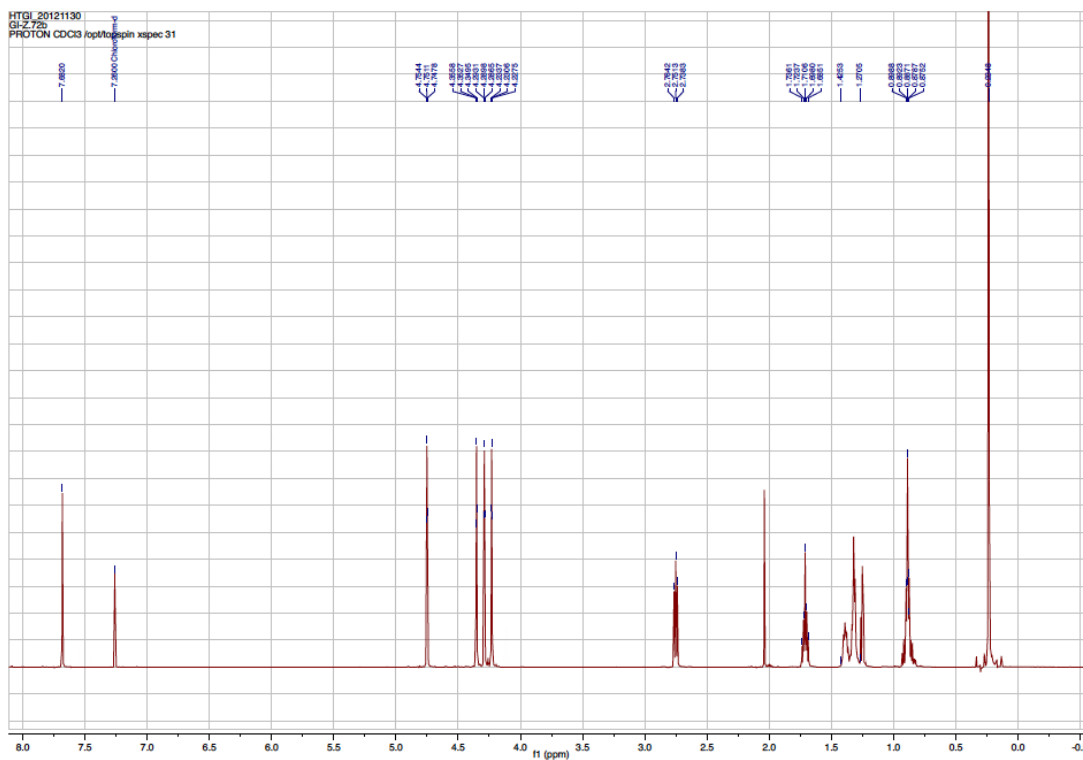

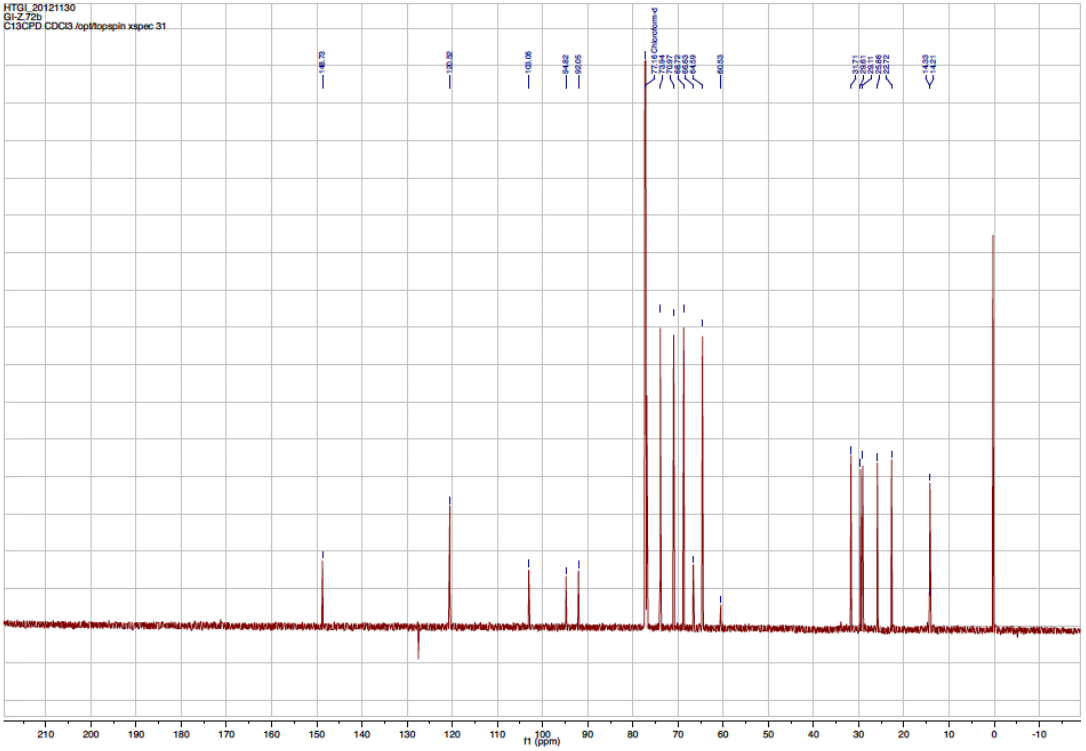

**Figure ESI 6:**  $^1\text{H}$  and  $^{13}\text{C}$  NMR spectra of **22**.

**1-(Trimethylsilylethynyl)-1'-(4-(methyl-1-ol)-1H-1,2,3-triazol-1-yl)-ferrocene 23:**

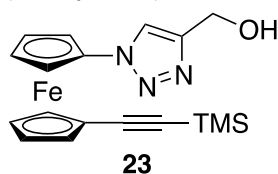

Product was isolated after flash column chromatography (60% to 75% EA in PE) as yellow solid (22%): m.p. 158-159 °C;  $^1\text{H}$  NMR: 400 MHz,  $\text{CDCl}_3$ :  $\delta_{\text{H}}$  7.94 (s, 1H), 4.84 (d,  $J$  = 5.8 Hz, 2H), 4.77 (m, 2H), 4.39 (m, 2H), 4.30 (m, 2H), 4.23 (m, 2H), 3.02 (t,  $J$  = 5.9 Hz, 1H), 0.23 (s, 9H);  $^{13}\text{C}$  NMR:  $\delta_{\text{C}}$  147.8, 121.6, 102.9, 94.5, 92.3, 73.8, 71.1, 69.1, 66.9, 64.5, 56.6, 0.2; IR:  $\nu_{\text{max}}/\text{cm}^{-1}$  3401, 3144, 3097, 2953, 2149, 1557, 1521, 1455, 1409, 1247, 1221, 1079, 1041, 1012, 925, 838, 811, 757, 724, 696; HRMS  $m/z$  calculated for:  $\text{C}_{18}\text{H}_{22}\text{FeN}_3\text{OSi}$   $[\text{M}+\text{H}]^+$  380.0882, found 380.0901; LRMS  $m/z$  380.0  $[\text{M}+\text{H}]^+$ , UV/vis:  $\lambda_{\text{max}}(\text{DCM})/\text{nm}$  ( $\epsilon / \text{mol}^{-1}\text{cm}^{-1}\text{dm}^3$ ) 236 ( $14.32 \times 10^3$ ), 244 ( $12.42 \times 10^3$ ), 267 ( $8.69 \times 10^3$ ), 330 (769), 441 (305).

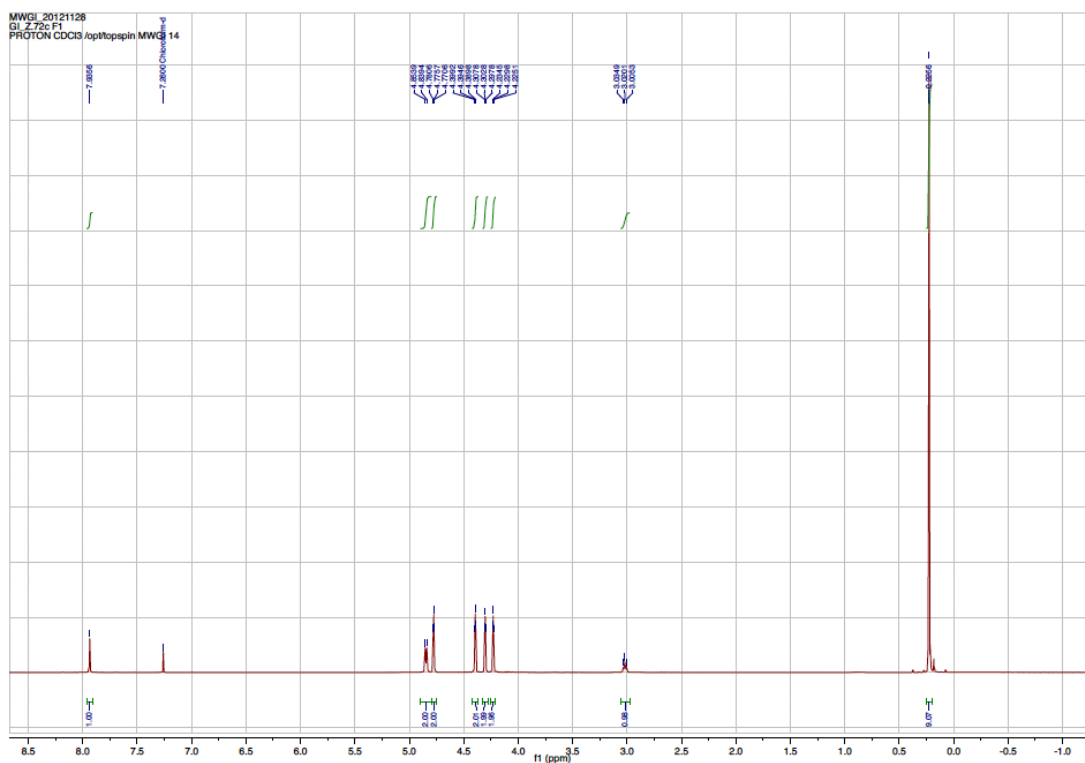

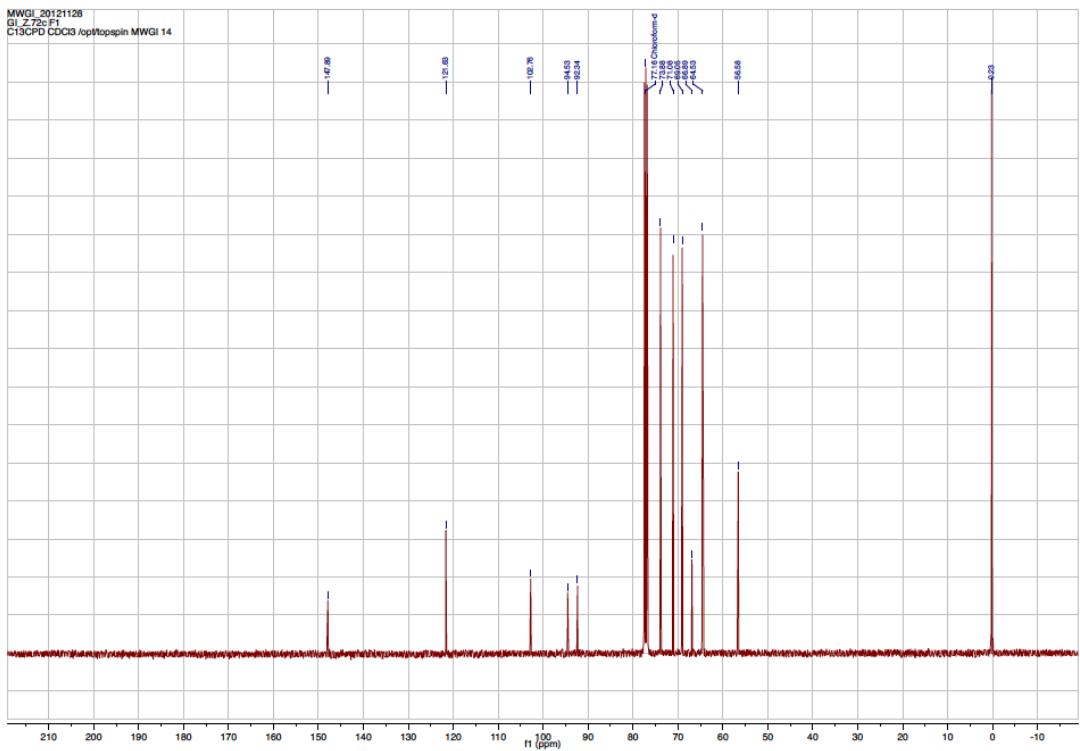

**Figure ESI 7:**  $^1\text{H}$  and  $^{13}\text{C}$  NMR spectra of **23**.

**1-(Trimethylsilylethynyl)-1'-(4-(3,5-di-tert-butylphenyl)-1H-1,2,3-triazol-1-yl)-ferrocene **24**:**

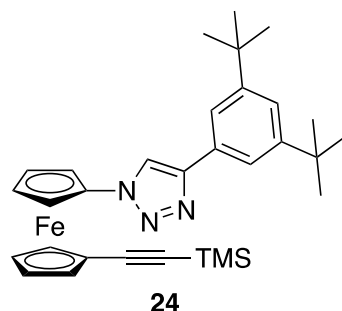

Product was isolated after flash column chromatography (10% EA in PE) as yellow solid (30%): m.p. 169-171 °C;  $^1\text{H}$  NMR: 400 MHz,  $\text{CDCl}_3$ :  $\delta_{\text{H}}$  8.02 (s, 1H), 7.72 (d,  $J = 1.8$  Hz, 2H), 7.45 (t,  $J = 1.8$  Hz, 1H), 4.88 (st, 2H), 4.44 (st, 2H), 4.33 (st, 2H), 4.26 (st, 2H), 1.39 (s, 18H), 0.19 (s, 9H);  $^{13}\text{C}$  NMR:  $\delta_{\text{C}}$  151.5, 148.8, 129.7, 122.7, 120.4, 118.8, 102.6, 94.8, 92.2, 73.9, 71.1, 69.0, 67.0, 64.1, 35.1, 31.6, 0.3; IR:  $\nu_{\text{max}}/\text{cm}^{-1}$  3117, 3085, 2952, 2899, 2864, 2148, 1596, 1520, 1475, 1448, 1421, 1392, 1362, 1288, 1248, 1223, 1201, 1072, 1041, 1025, 924, 878, 857, 832, 757, 726, 712; HRMS  $m/z$  calculated for:  $\text{C}_{31}\text{H}_{40}\text{FeN}_3\text{Si}$   $[\text{M}+\text{H}]^+$  538.234, found 538.2347; LRMS  $m/z$  538.2  $[\text{M}+\text{H}]^+$ ; UV/vis:  $\lambda_{\text{max}}(\text{DCM})/\text{nm}$  ( $\epsilon / \text{mol}^{-1}\text{cm}^{-1}\text{dm}^3$ ) 246 ( $22.56 \times 10^3$ ), 276 ( $14.92 \times 10^3$ ), 297 ( $9.53 \times 10^3$ ), 330 ( $1.74 \times 10^3$ ), 445 (442).

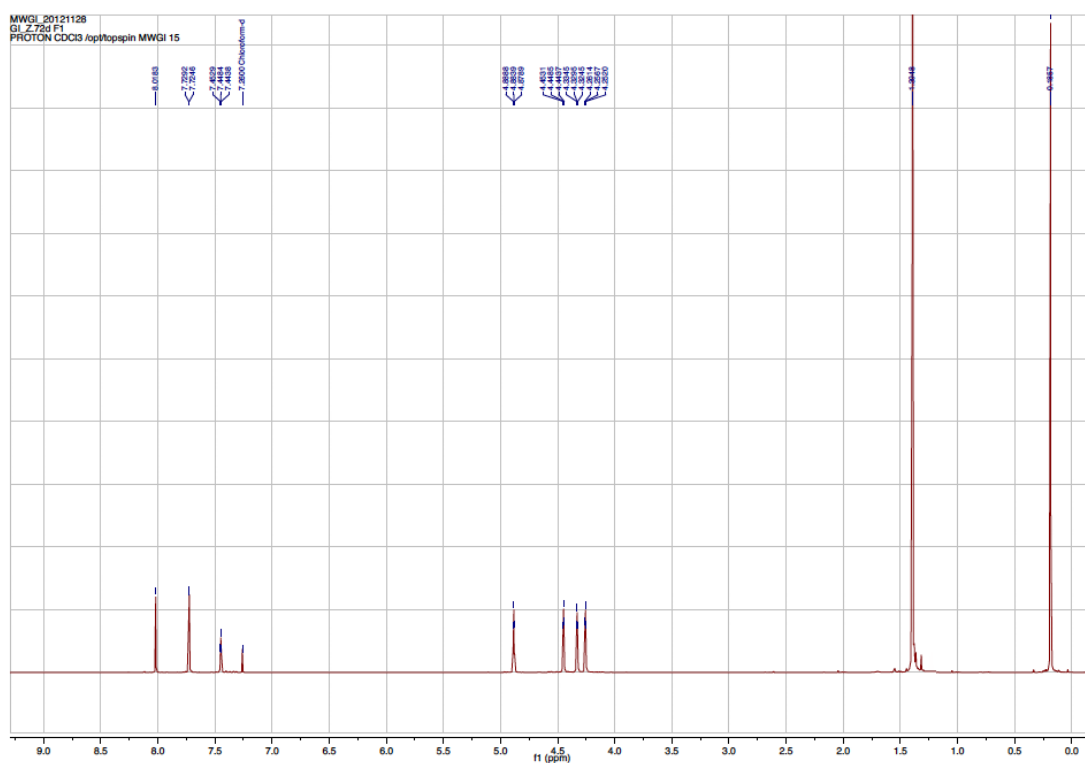

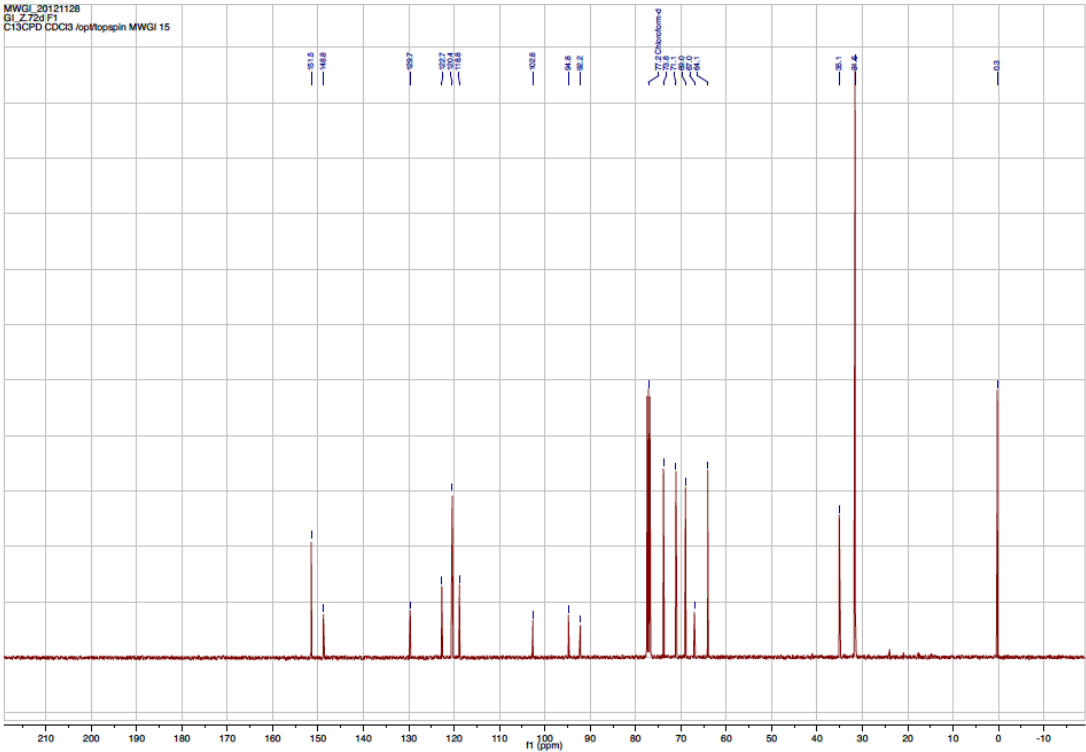

**Figure ESI 8:**  $^1\text{H}$  and  $^{13}\text{C}$  NMR spectra of **25**.

**General procedure for the deprotection of 8 and 22-24 with TBAF as represented by the synthesis of 1-ethynyl-1'-(4-phenyl-1H-1,2,3-triazol-1-yl)-ferrocene 9.**

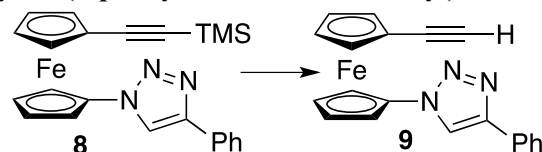

A solution of TBAF (1.0 M in THF, 120  $\mu$ L, 1.0 equiv.) was added to a solution of clickate **8** (50 mg, 0.12 mmol, 1.0 equiv.) in anhydrous THF (5 mL) and the reaction was stirred for 7 h until complete deprotection occurred as judged by TLC analysis. The reaction was then treated with citric acid (5% aqueous, 10 mL) and the product was extracted with DCM (3 x 20 mL). The combined organic extracts were dried over  $\text{MgSO}_4$  and solvent was removed *in vacuo*. The product **9** was isolated after flash column chromatography (41 mg, 89%) as orange solid: m.p. 138-140  $^{\circ}\text{C}$ ;  $^1\text{H}$  NMR: 600 MHz,  $\text{CDCl}_3$ :  $\delta_{\text{H}}$  8.10 (s, 1H), 7.91 – 7.87 (m, 2H), 7.48 – 7.44 (m, 2H), 7.38 – 7.35 (m, 1H), 4.93 (m, 2H), 4.49 (m, 2H), 4.35 (m, 2H), 4.29 (m, 2H), 2.26 (s, 1H);  $^{13}\text{C}$  NMR:  $\delta_{\text{C}}$  147.8, 130.5, 129.0, 128.4, 127.5, 125.9, 119.2, 94.8, 80.9, 75.3, 73.8, 70.9, 68.6, 63.8; IR:  $\nu_{\text{max}}/\text{cm}^{-1}$  3265, 3119, 3093, 2923, 2106, 1519, 1476, 1448, 1221, 1066, 1041, 1030, 971, 913, 875, 820, 759; HRMS  $m/z$  calculated for:  $\text{C}_{20}\text{H}_{16}^{54}\text{FeN}_3$   $[\text{M}+\text{H}]^+$  352.0740, found 352.0754; LRMS  $m/z$  376  $[\text{M}+\text{Na}]^+$ ; UV/vis:  $\lambda_{\text{max}}(\text{DCM})/\text{nm}$  ( $\epsilon/\text{mol}^{-1}\text{cm}^{-1}\text{dm}^3$ ) 248 ( $19.53 \times 10^3$ ), 273 ( $10.67 \times 10^3$ ), 292 ( $7.55 \times 10^3$ ), 327 ( $1.45 \times 10^3$ ), 444 (297).

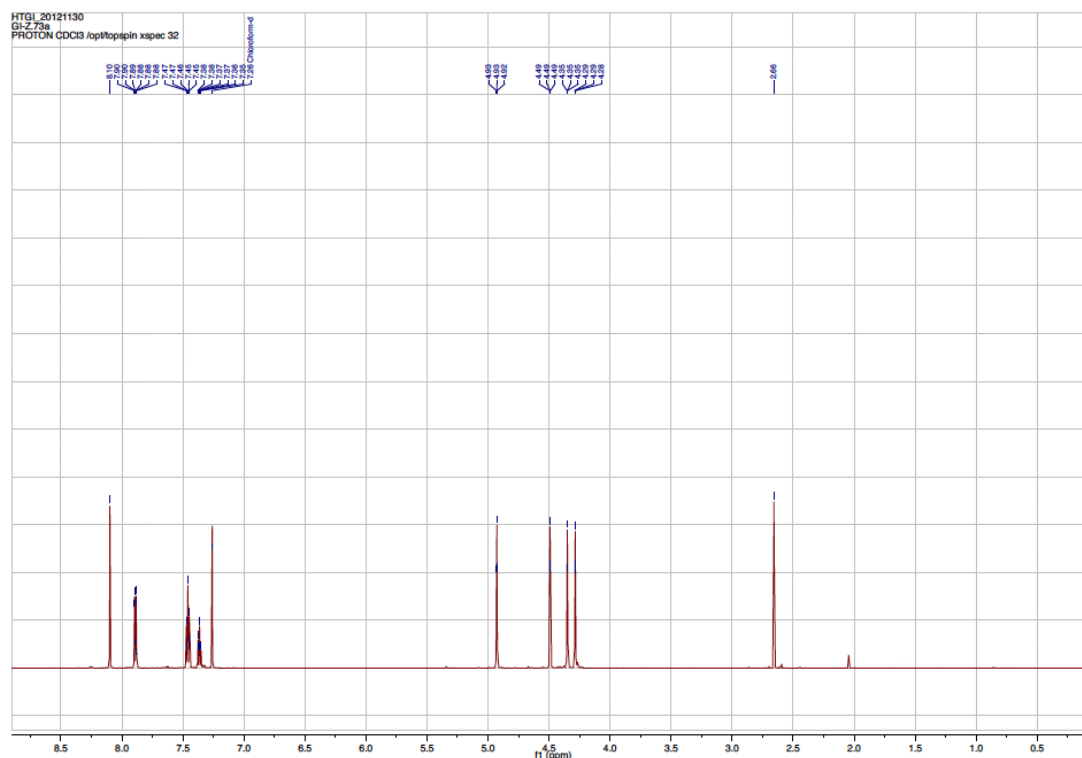

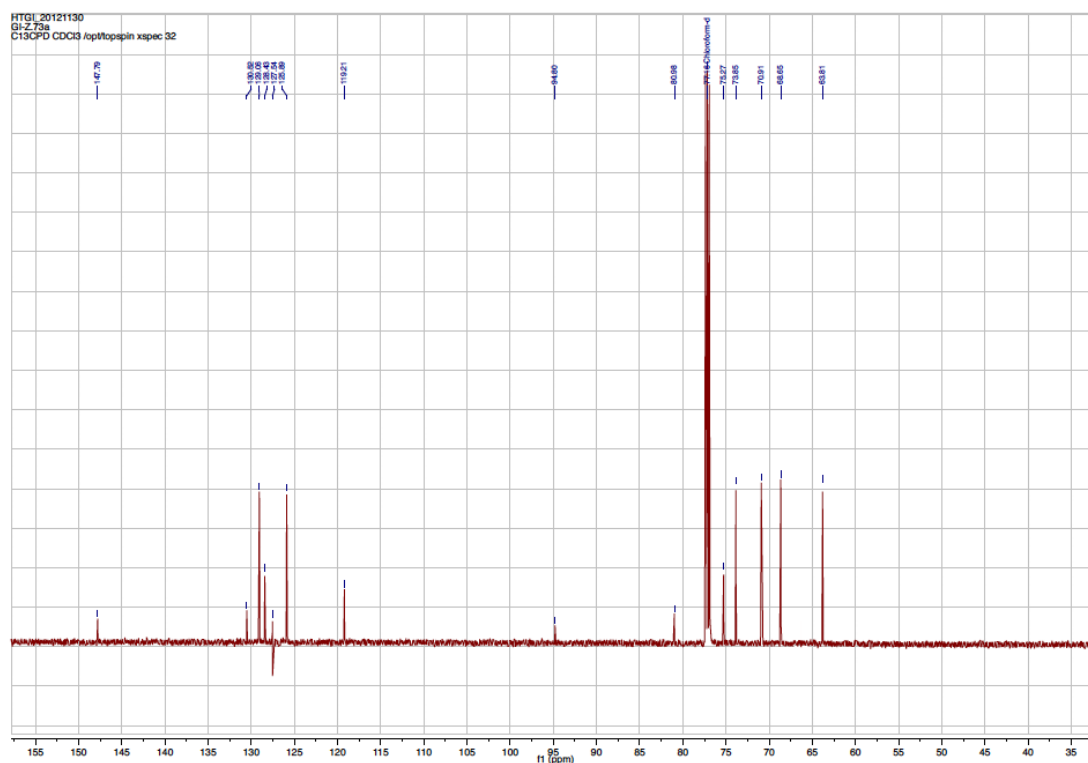

**Figure ESI 9:**  $^1\text{H}$  and  $^{13}\text{C}$  NMR spectra of **9**.

**General procedure for the deprotection of **8** and **22-24** with  $\text{K}_2\text{CO}_3$  as represented by the synthesis of 1-ethynyl-1'-(4-phenyl-1H-1,2,3-triazol-1-yl)-ferrocene **9**:**

$\text{K}_2\text{CO}_3$  (100 mg) was added to a solution of “clickate” **8** (50 mg, 0.12 mmol, 1.0 equiv.) in MeOH (5.0 mL) and the reaction was stirred at r.t. for 16 h, after which it was filtered and concentrated *in vacuo*. The product **9** was isolated after flash column chromatography (34 mg, 75%) as orange solid.

### 1-Ethynyl-1'-(4-hexyl-1H-1,2,3-triazol-1-yl)-ferrocene **25**:

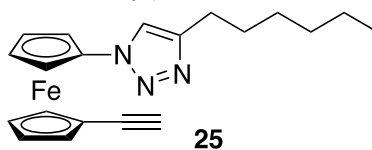

Product was isolated after flash column chromatography (20% EA in PE) as yellow solid (93%): m.p. 53-55 °C;  $^1\text{H}$  NMR: 400 MHz,  $\text{CDCl}_3$ :  $\delta_{\text{H}}$  7.60 (s, 1H), 4.83 (m, 2H), 4.43 (m, 2H), 4.30 (m, 2H), 4.24 (m, 2H), 2.75 (t,  $J = 7.6$  Hz, 2H), 2.66 (s, 1H), 1.74 – 1.67 (m, 2H), 1.45 – 1.23 (m, 6H), 0.94 – 0.84 (m, 3H);  $^{13}\text{C}$  NMR:  $\delta_{\text{C}}$  148.6, 120.4, 95.0, 81.2, 75.0, 73.8, 70.9, 68.5, 66.1, 63.7, 31.7, 29.5, 29.1, 25.8, 22.7, 14.2; IR:  $\nu_{\text{max}}/\text{cm}^{-1}$  3250, 3122, 3092, 2957, 2928, 2849, 2110, 1552, 1518, 1463, 1448, 1224, 1213, 1077, 1057, 1041, 1033, 1022, 919, 876, 819, 719; HRMS  $m/z$  calculated for:  $\text{C}_{20}\text{H}_{24}\text{N}_3^{54}\text{Fe}$   $[\text{M}+\text{H}]^+$  360.1366, found 360.1363; LRMS:  $m/z$  362.1  $[\text{M}+\text{H}]^+$ ; UV/vis:  $\lambda_{\text{max}}(\text{DCM})/\text{nm}$  ( $\epsilon / \text{mol}^{-1}\text{cm}^{-1}\text{dm}^3$ ) 236 ( $13.27 \times 10^3$ ), 246 ( $11.09 \times 10^3$ ), 266 ( $8.44 \times 10^3$ ), 322 (854), 442 (296).

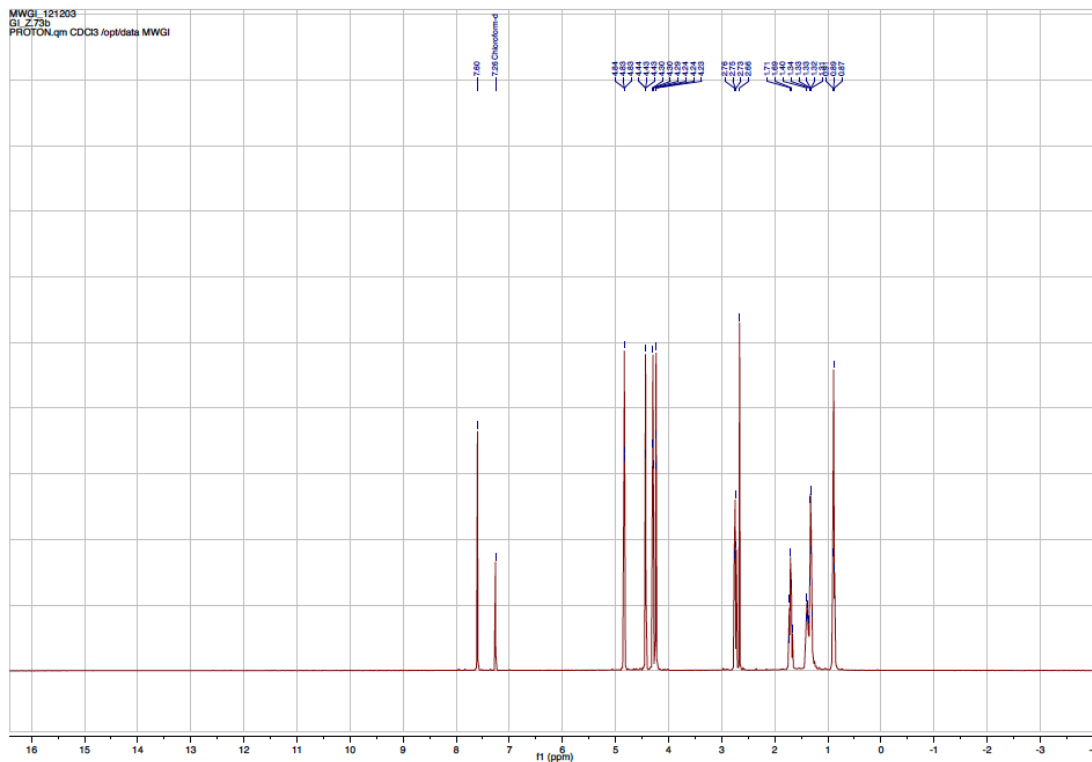

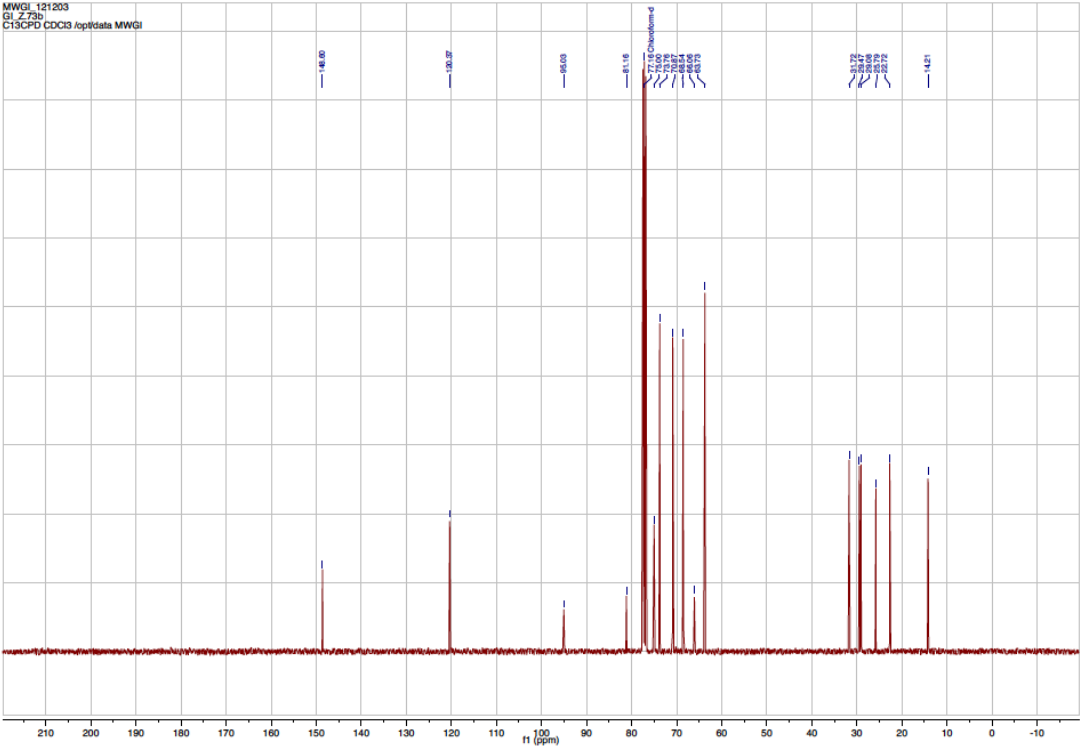

**Figure ESI 10:**  $^1\text{H}$  and  $^{13}\text{C}$  NMR spectra of **25**.

**1-Ethynyl-1'-(4-(methyl-1-ol)-1H-1,2,3-triazol-1-yl)-ferrocene 26:**

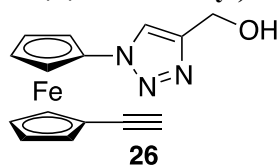

Product was isolated after flash column chromatography (75% to 100% EA in PE) as yellow solid (90%): m.p. 109-110 °C;  $^1\text{H}$  NMR: 600 MHz,  $\text{CDCl}_3$ :  $\delta_{\text{H}}$  7.88 (s, 1H), 4.86 (m, 2H), 4.85 (d,  $J = 6.0$  Hz, 2H), 4.46 (m, 2H), 4.32 (m, 2H), 4.25 (m, 2H), 2.89 (t,  $J = 6.1$  Hz, 2H), 2.68 (s, 1H);  $^{13}\text{C}$  NMR:  $\delta_{\text{C}}$  147.6, 121.5, 94.7, 80.8, 75.5, 73.8, 70.9, 68.7, 66.3, 63.8, 56.6; IR:  $\nu_{\text{max}}/\text{cm}^{-1}$  3263, 3134, 3088, 2859, 1559, 1520, 1217, 1068, 1043, 918, 876, 848, 823, 811, 745; HRMS  $m/z$  calculated for:  $\text{C}_{15}\text{H}_{14}\text{FeN}_3\text{O}$   $[\text{M}+\text{H}]^+$  308.0486, found 308.0489; LRMS:  $m/z$  330.0  $[\text{M}+\text{Na}]^+$ ; UV/vis:  $\lambda_{\text{max}}(\text{DCM})/\text{nm}$  ( $\epsilon / \text{mol}^{-1}\text{cm}^{-1}\text{dm}^3$ ) 236 ( $11.61 \times 10^3$ ), 246 ( $9.03 \times 10^3$ ), 272 ( $7.77 \times 10^3$ ), 337 (496), 444 (261).

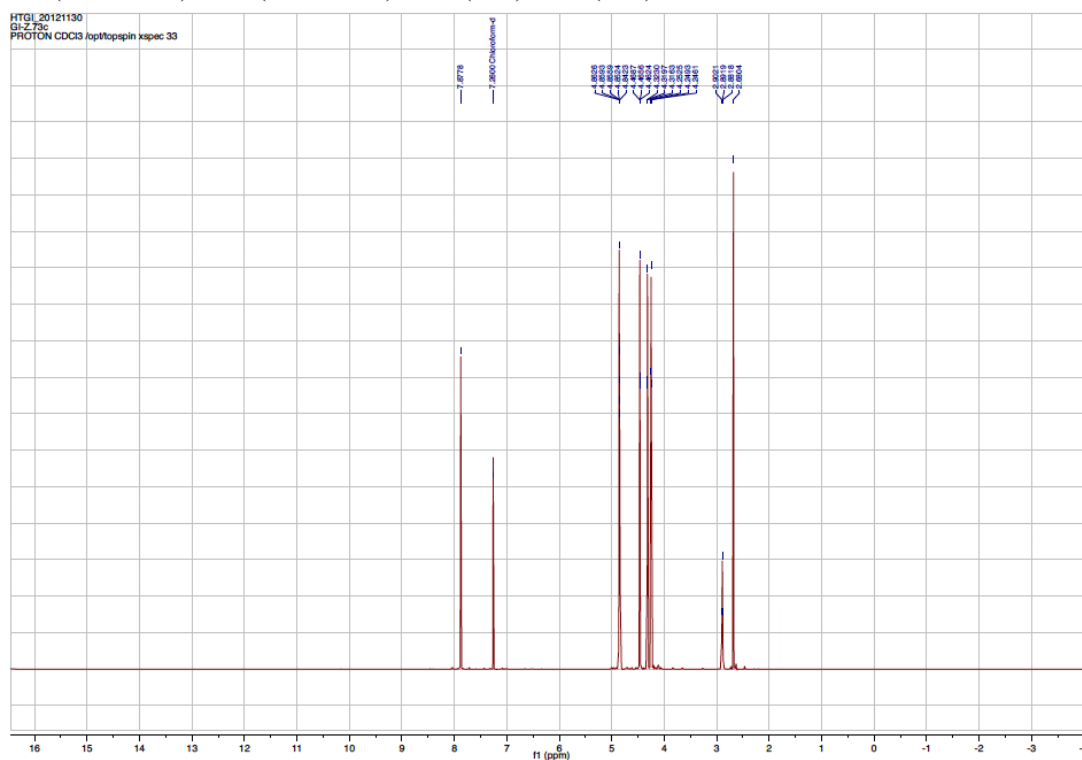



**1-Ethynyl-1'-(4-(3,5-di-tert-butylphenyl)-1H-1,2,3-triazol-1-yl)-ferrocene 27:**

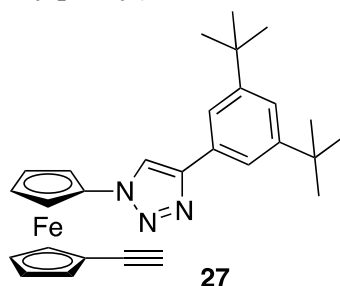

Product was isolated after flash column chromatography (10% EA in PE) as yellow solid (84%): m.p. 185-187 °C;  $^1\text{H}$  NMR: 600 MHz,  $\text{CDCl}_3$ :  $\delta_{\text{H}}$  8.10 (s, 1H), 7.72 (d,  $J = 1.8$  Hz, 2H), 7.45 (t,  $J = 1.8$  Hz, 1H), 4.94 (m, 2H), 4.48 (m, 2H), 4.34 (m, 2H), 4.28 (m, 2H), 2.68 (s, 1H), 1.40 (s, 18H);  $^{13}\text{C}$  NMR:  $\delta_{\text{C}}$  151.5, 148.7, 129.7, 122.7, 120.3, 119.2, 94.8, 81.2, 75.1, 73.9, 70.9, 68.6, 66.2, 63.9, 35.1, 31.6; IR:  $\nu_{\text{max}}/\text{cm}^{-1}$  3292, 3264, 3115, 3088, 2961, 2905, 2867, 2113, 1597, 1520, 1476, 1421, 1394, 1362, 1284, 1226, 1076, 1039, 916, 898, 878, 826, 767, 709; HRMS  $m/z$  calculated for:  $\text{C}_{28}\text{H}_{32}\text{FeN}_3$   $[\text{M}+\text{H}]^+$  466.1946, found 466.1943; LRMS:  $m/z$  488.1  $[\text{M}+\text{Na}]^+$ ; UV/vis:  $\lambda_{\text{max}}(\text{DCM})/\text{nm}$  ( $\epsilon / \text{mol}^{-1}\text{cm}^{-1}\text{dm}^3$ ) 248 ( $26.86 \times 10^3$ ), 279 ( $14.19 \times 10^3$ ), 298 ( $10.09 \times 10^3$ ), 323 ( $2.17 \times 10^3$ ), 443 (436).

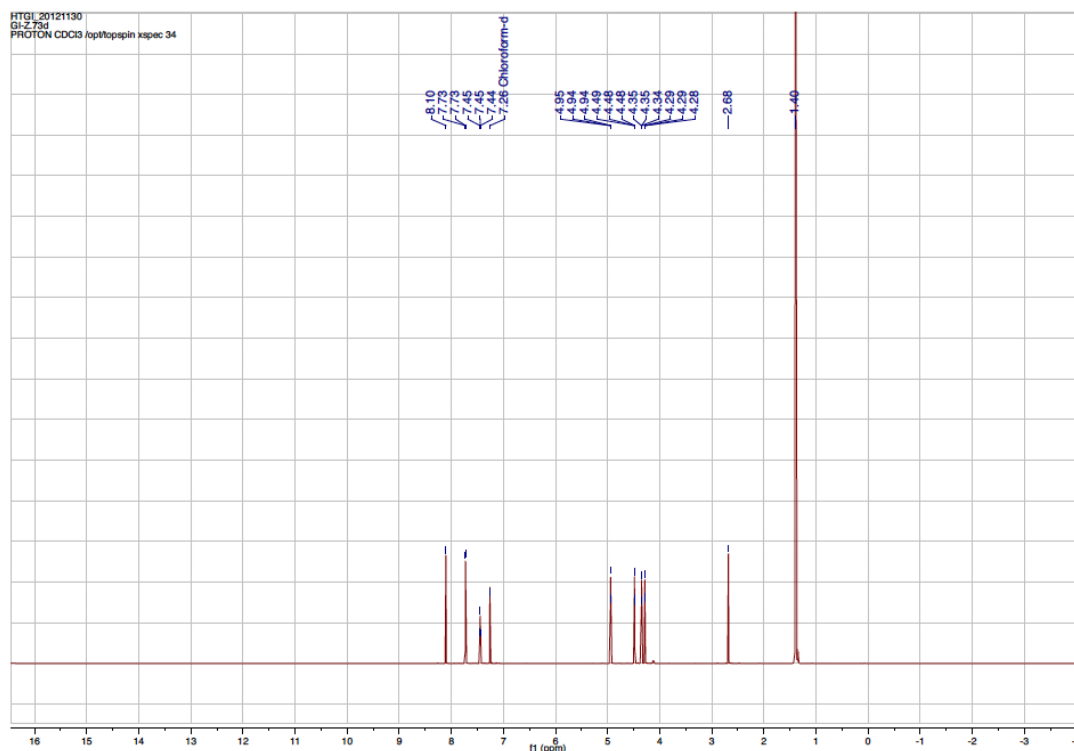

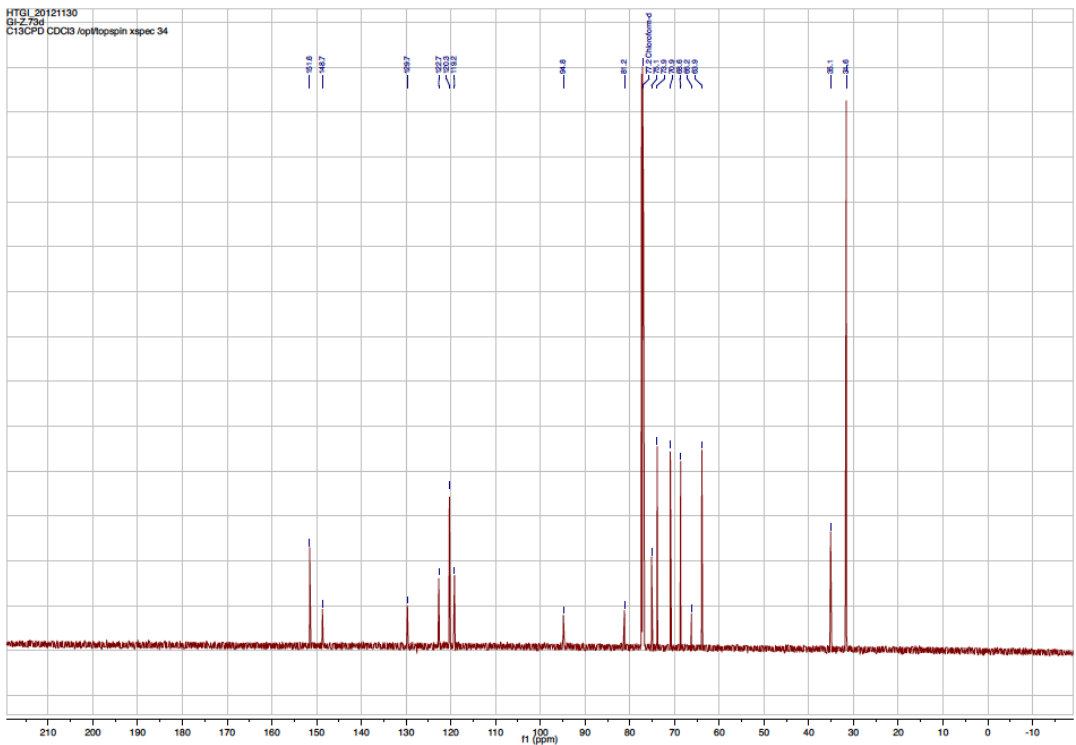

**Figure ESI 12:**  $^1\text{H}$  and  $^{13}\text{C}$  NMR spectra of **27**.

**General procedure for the second “click” as represented by the synthesis of 1-(1-benzyl-1H-,1,2,3-triazol-4-yl)-1’-(4-phenyl-1H-1,2,3-triazol-1-yl)-ferrocene **10**.**

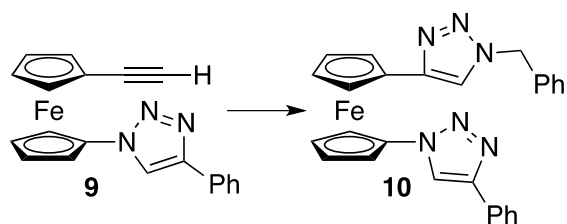

A solution of **9** (20 mg, 0.057 mmol, 1.0 equiv.) and benzyl azide (7.6 mg, 0.057, 1.01 equiv.) in THF (1.0 mL) was degassed, and a solution of CuSO<sub>4</sub>·5H<sub>2</sub>O (1.4 mg, 5.7 x 10<sup>-3</sup> mmol, 10 mol%) in water (100 µL) was added. A solution of sodium ascorbate (1.6 mg, 0.011 mmol, 20 mol%) in water (50 µL) was then added to initiate the reaction. After stirring the mixture at r.t for 16 h. it was diluted with a 1.0 M solution of EDTA in saturated NaHCO<sub>3</sub>. The product was extracted with DCM (3 x 10 mL). The combined organic extracts were dried over MgSO<sub>4</sub> and concentrated *in vacuo*. The product **10** was isolated after flash column chromatography (40% EA in PE) as yellow solid (18 mg, 69%).

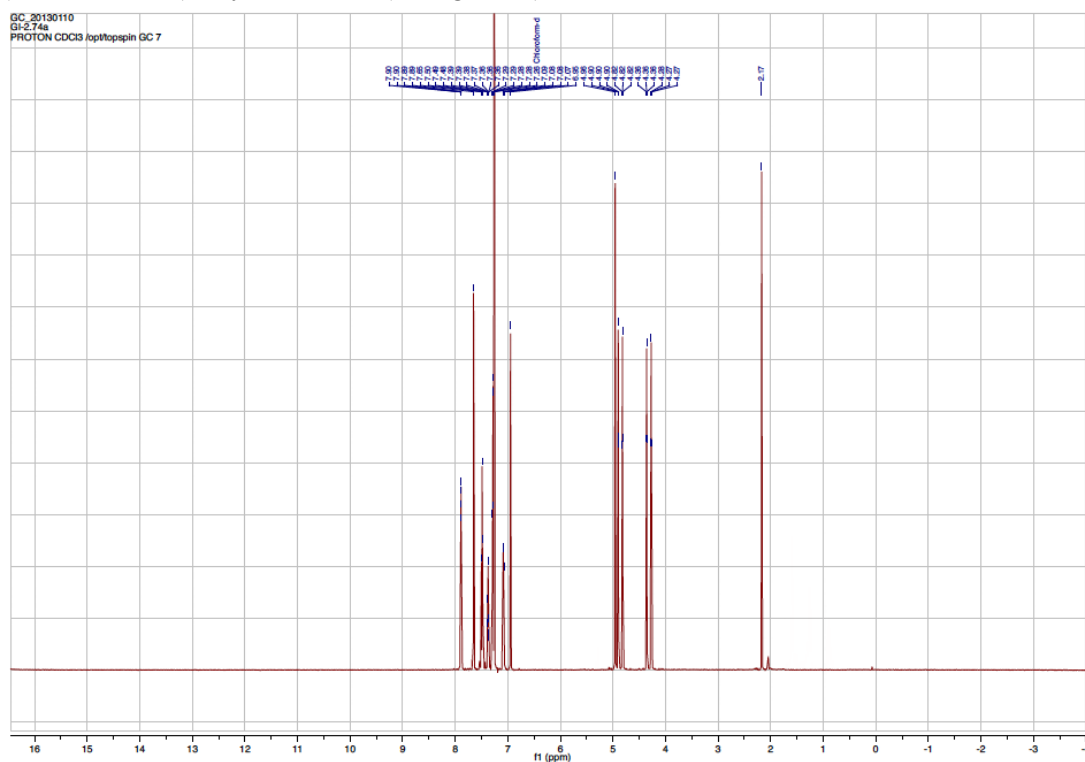

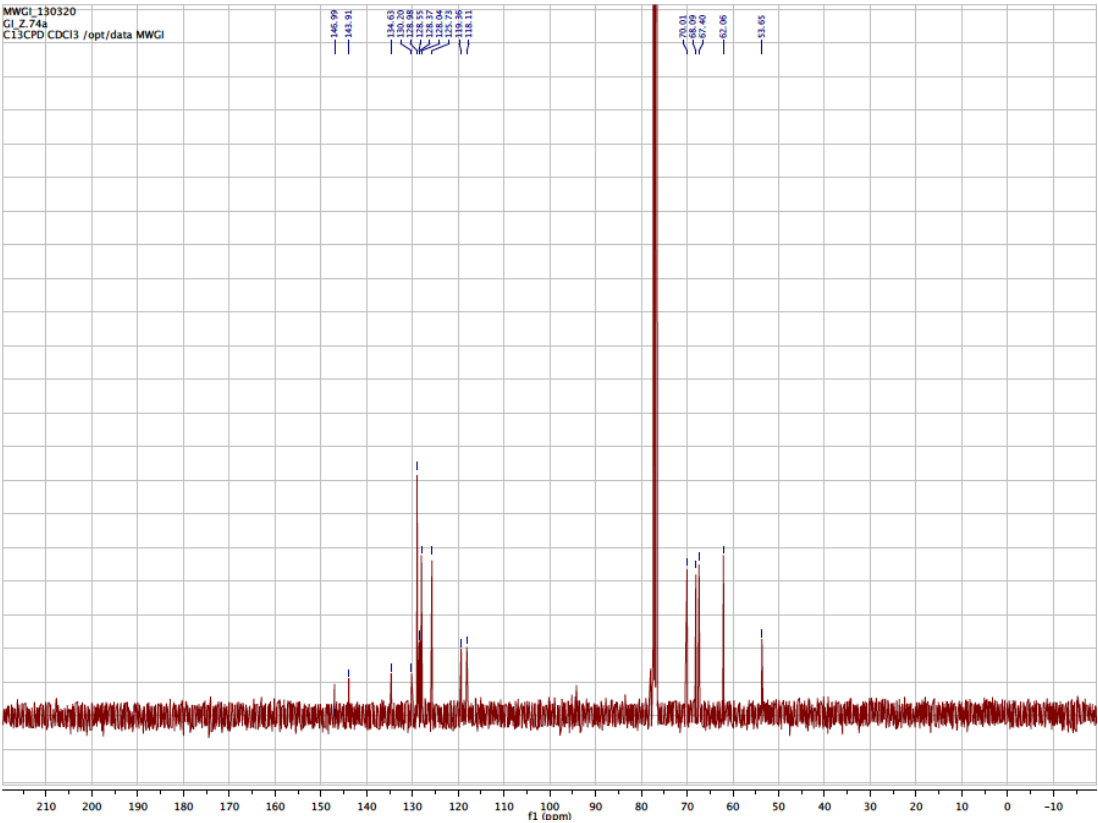

**Figure ESI 13:**  $^1\text{H}$  and  $^{13}\text{C}$  NMR spectra of **10**.

**1-(1-(2-(2-Ethoxyethoxy)ethanol)-1H-1,2,3-triazol-4-yl)-1'-(4-phenyl-1H-1,2,3-triazol-1-yl)-ferrocene 11**

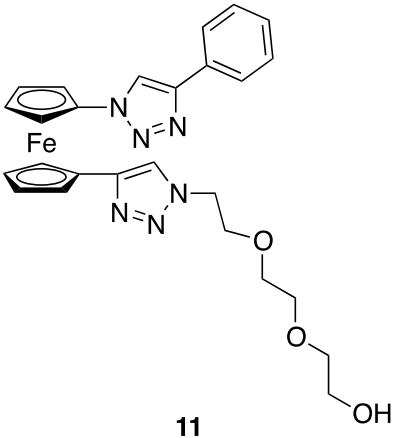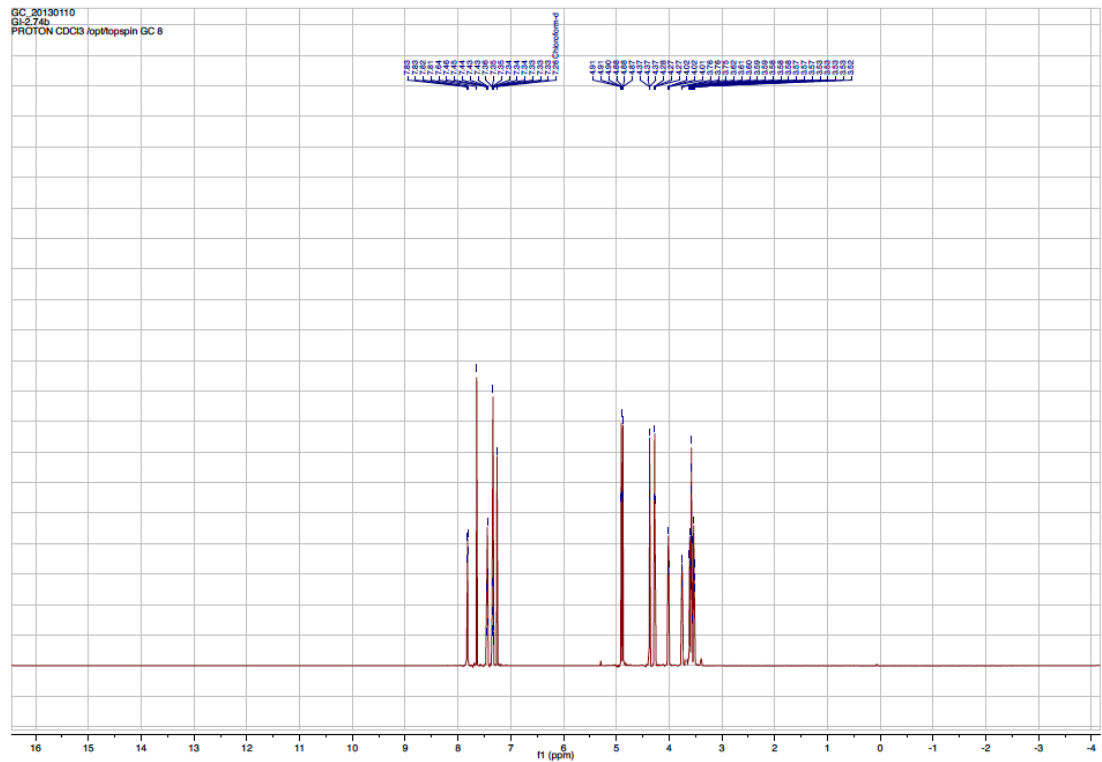



**1-(1-Adamantyl-1H-,1,2,3-triazol-4-yl)-1'-(4-phenyl-1H-1,2,3-triazol-1-yl)-ferrocene  
12:**

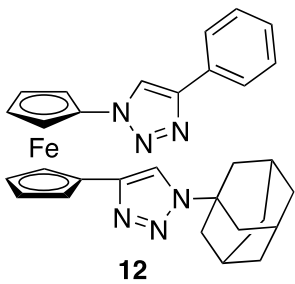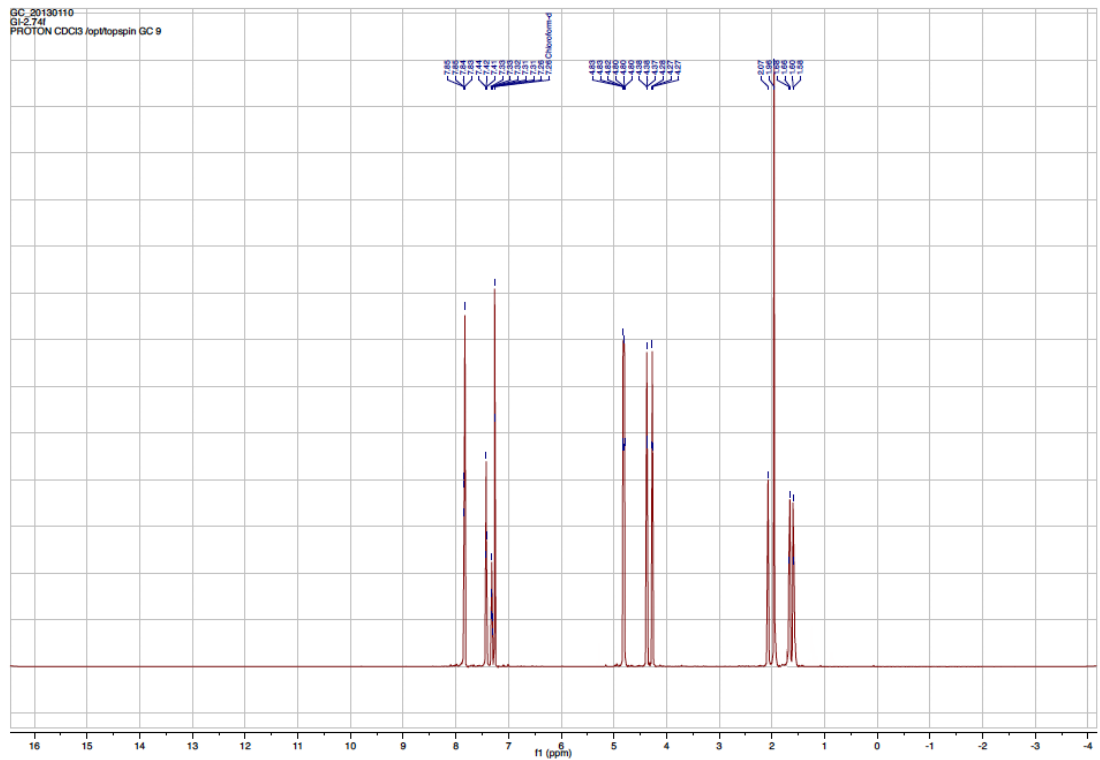

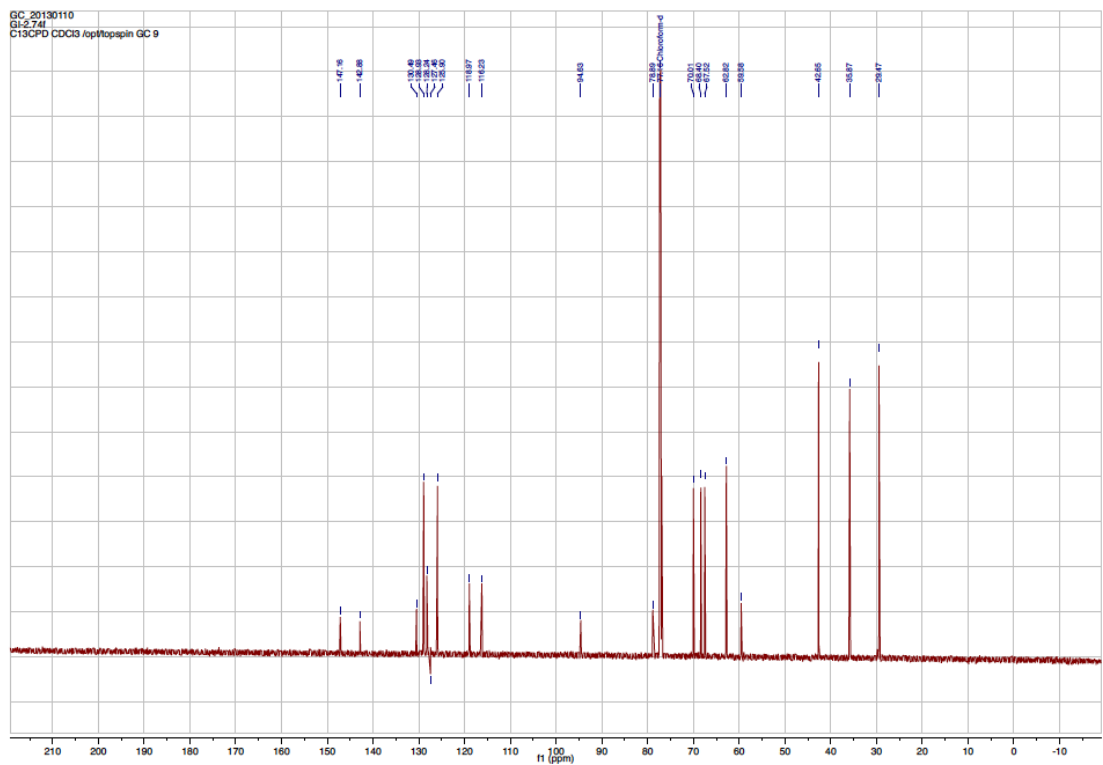

**Figure ESI 15:**  $^1\text{H}$  and  $^{13}\text{C}$  NMR spectra of **12**.

*1-(1-Benzyl-1H-1,2,3-triazol-4yl)-1'-(4-hexyl-1H-1,2,3-triazol-1-yl)-ferrocene 13*

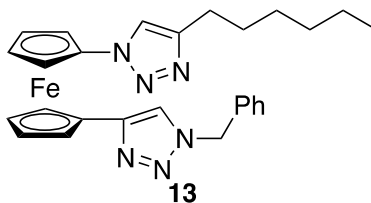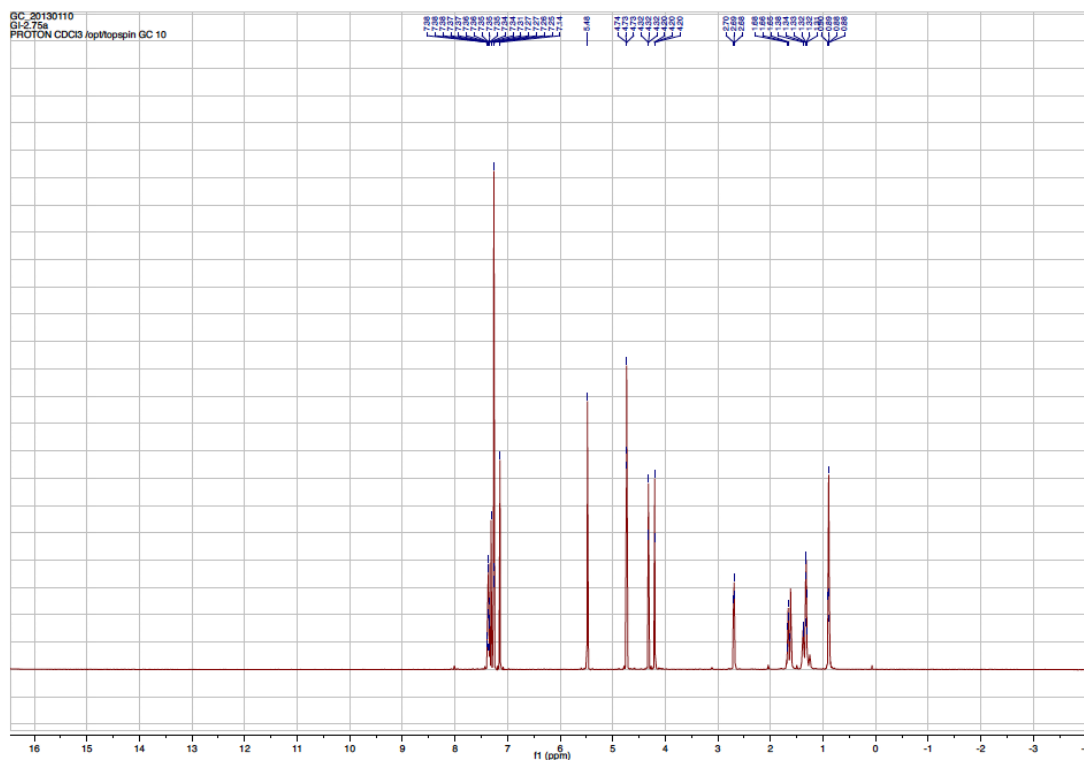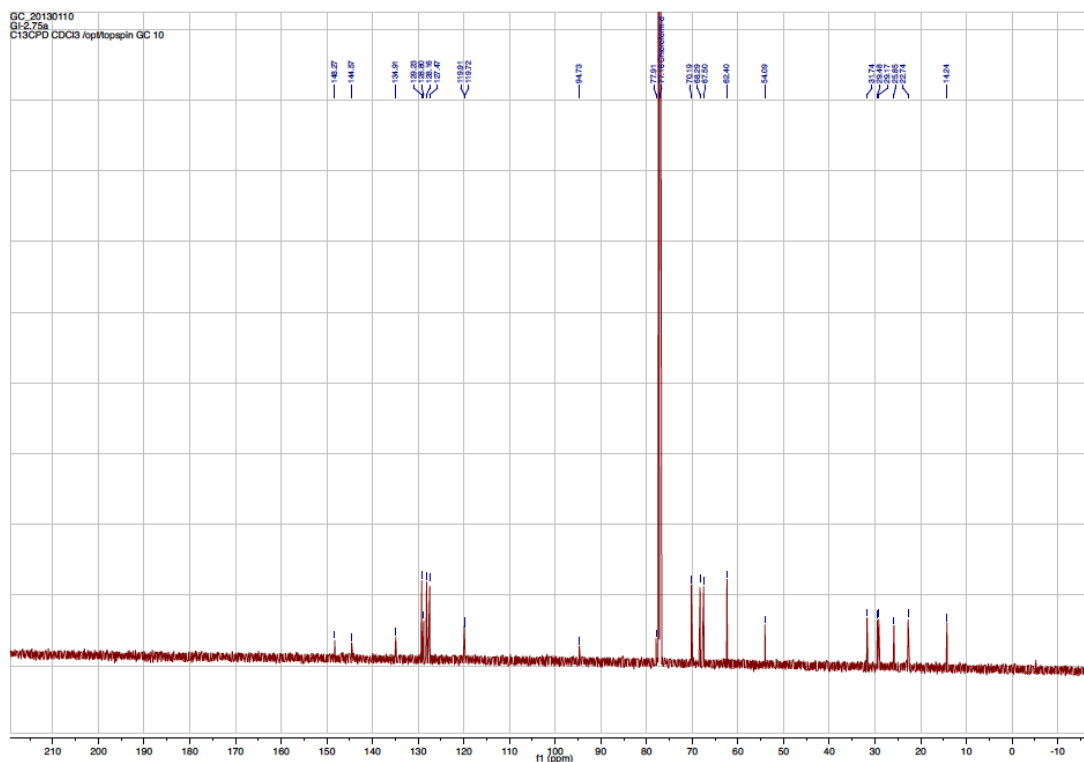

**Figure ESI 16:**  $^1\text{H}$  and  $^{13}\text{C}$  NMR spectra of **13**.

**1-(1-(2-(2-Ethoxyethoxy)ethanol)-1H-1,2,3-triazol-4-yl)-1'-(4-hexyl-1H-1,2,3-triazol-1-yl)-ferrocene 14:**

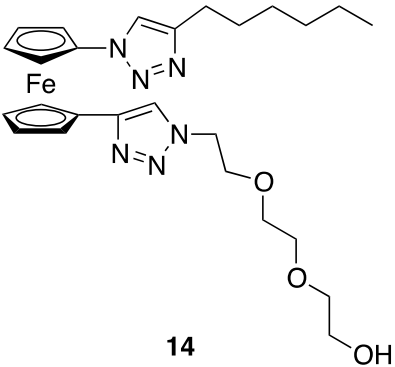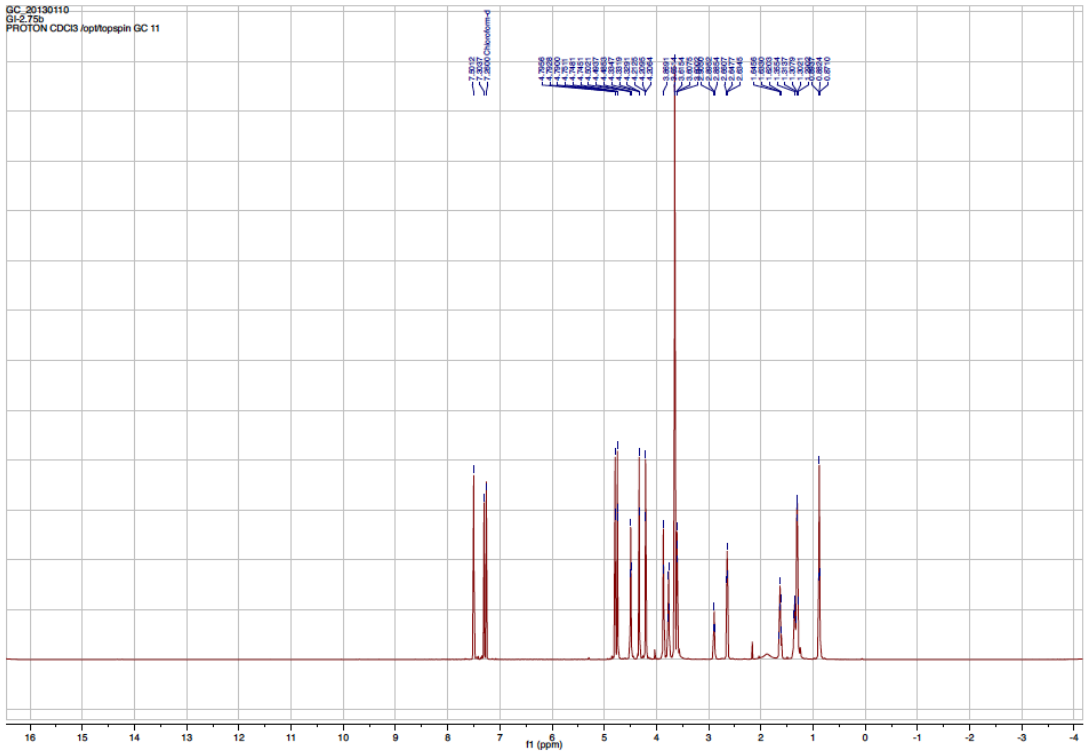

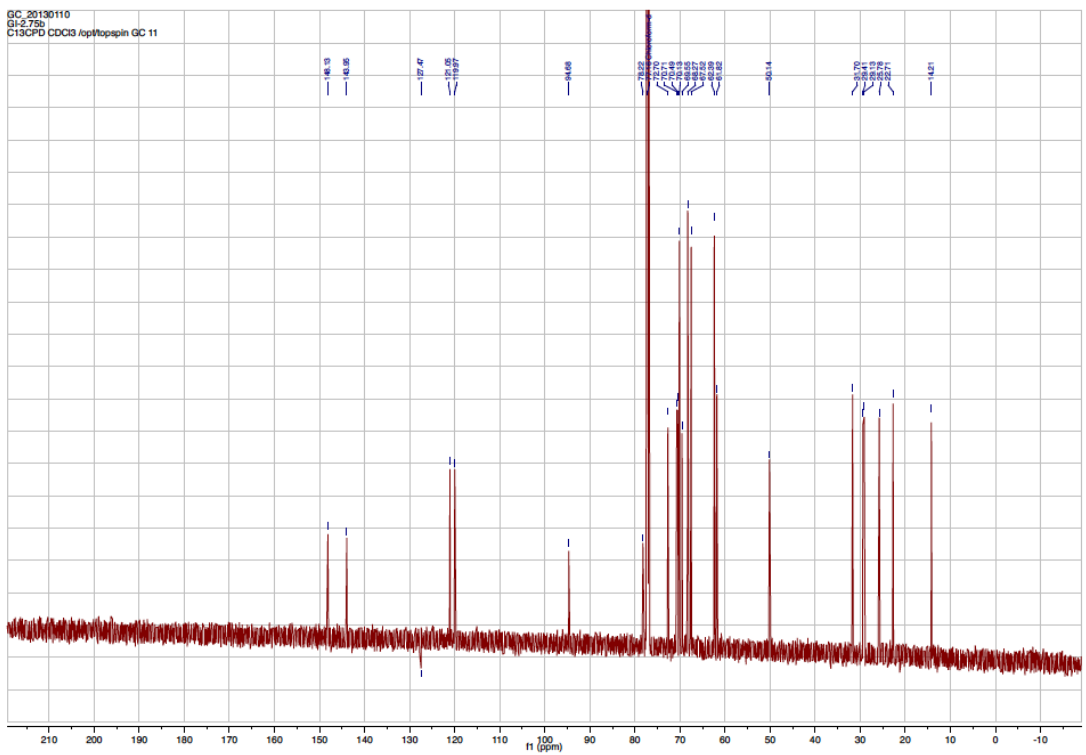

**Figure ESI 17:**  $^1\text{H}$  and  $^{13}\text{C}$  NMR spectra of **14**.

**1-(1-Adamantyl-1H-,1,2,3-triazol-4-yl)-1'-(4-hexyl-1H-1,2,3-triazol-1-yl)-ferrocene**  
**15:**

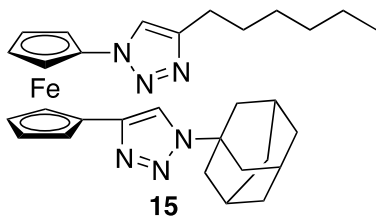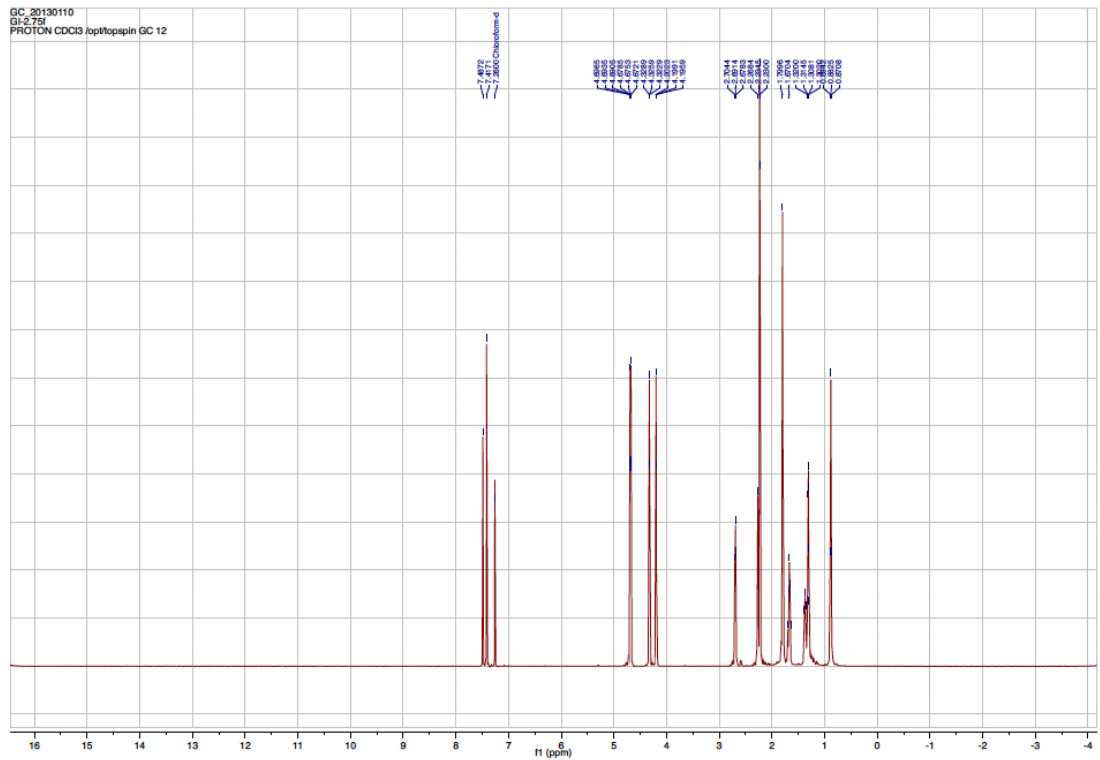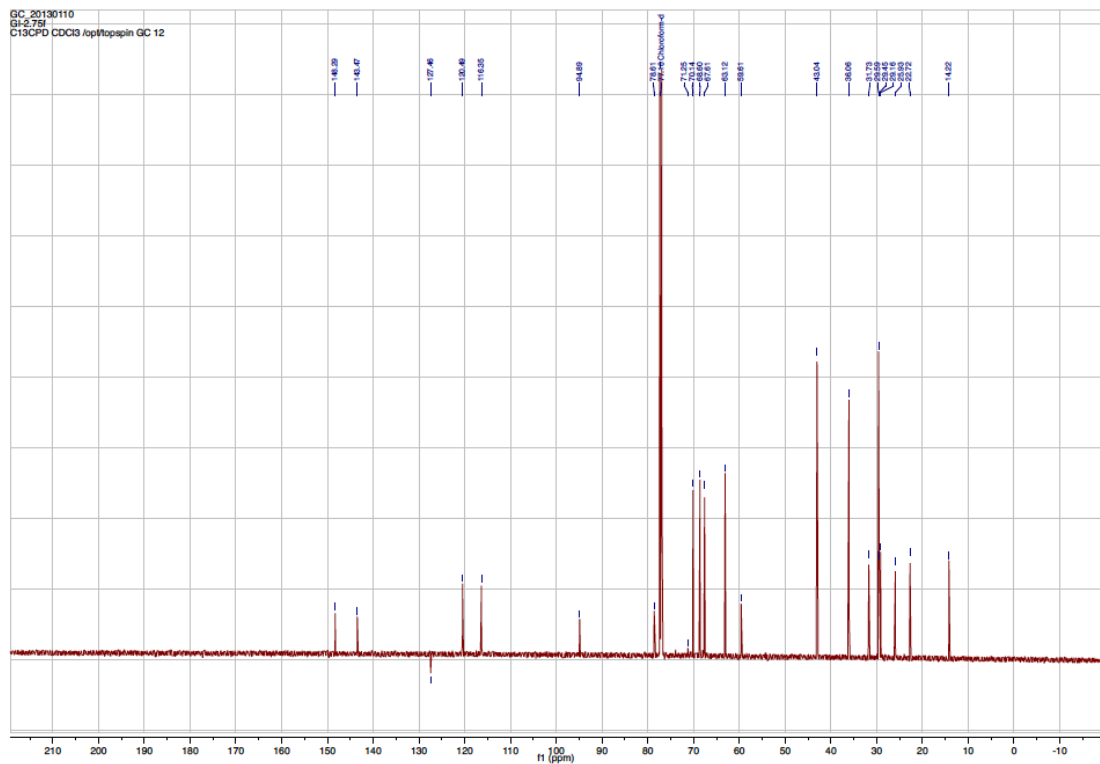

**Figure ESI 18:**  $^1\text{H}$  and  $^{13}\text{C}$  NMR spectra of **15**.

1-(1-Benzyl-1H-1,2,3-triazol-yl)-1'-(4-(methyl-1-ol)-1H-1,2,3-triazol-1-yl)-ferrocene 16:

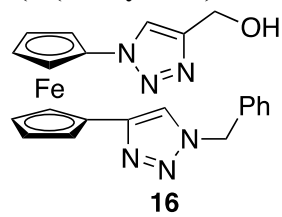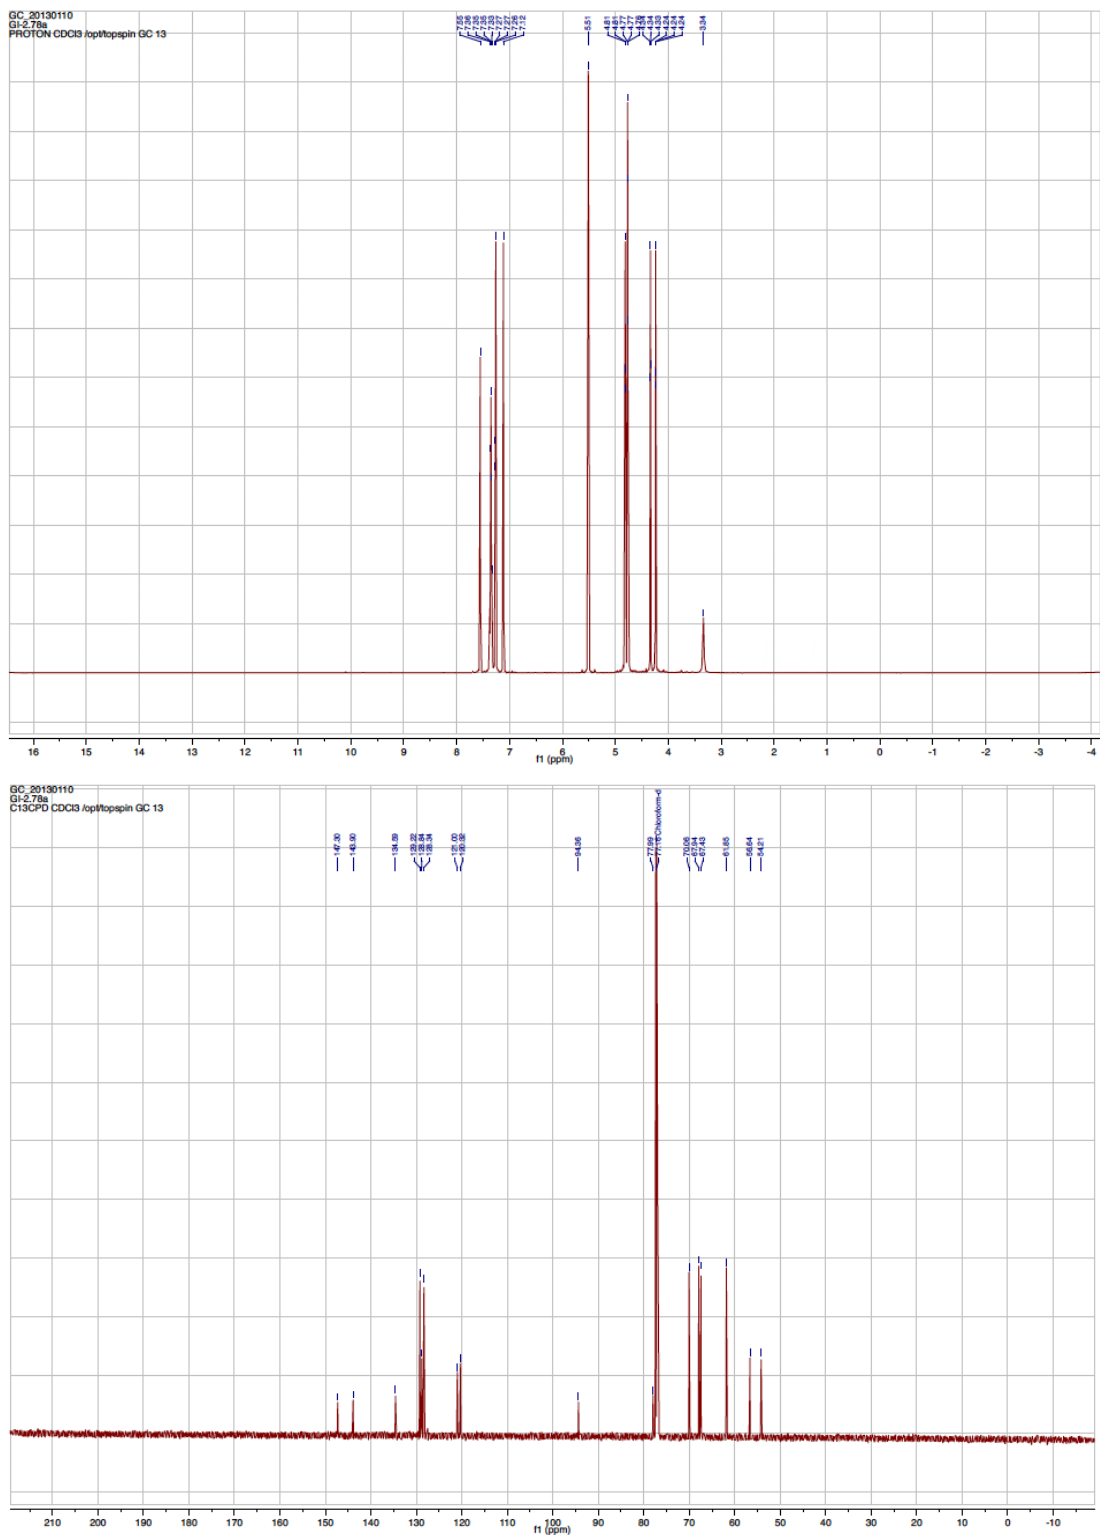

Figure ESI 19:  $^1\text{H}$  and  $^{13}\text{C}$  NMR spectra of 16.

**1-(1-(2-(2-Ethoxyethoxyl)ethanol)-1H-1,2,3-triazol-4-yl)-1'-(4-(methyl-1-ol)-1H-1,2,3-triazol-1-yl)-ferrocene 17:**

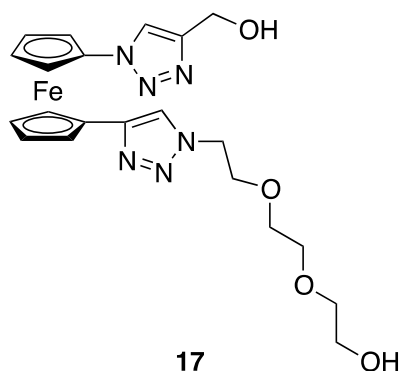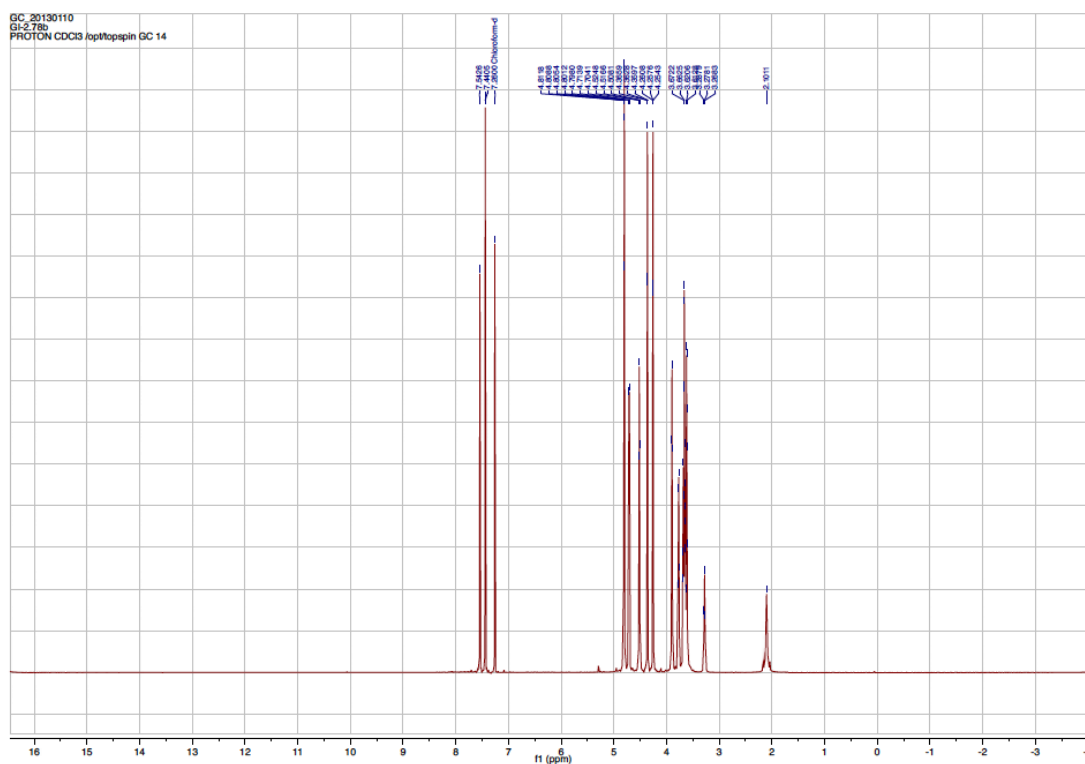

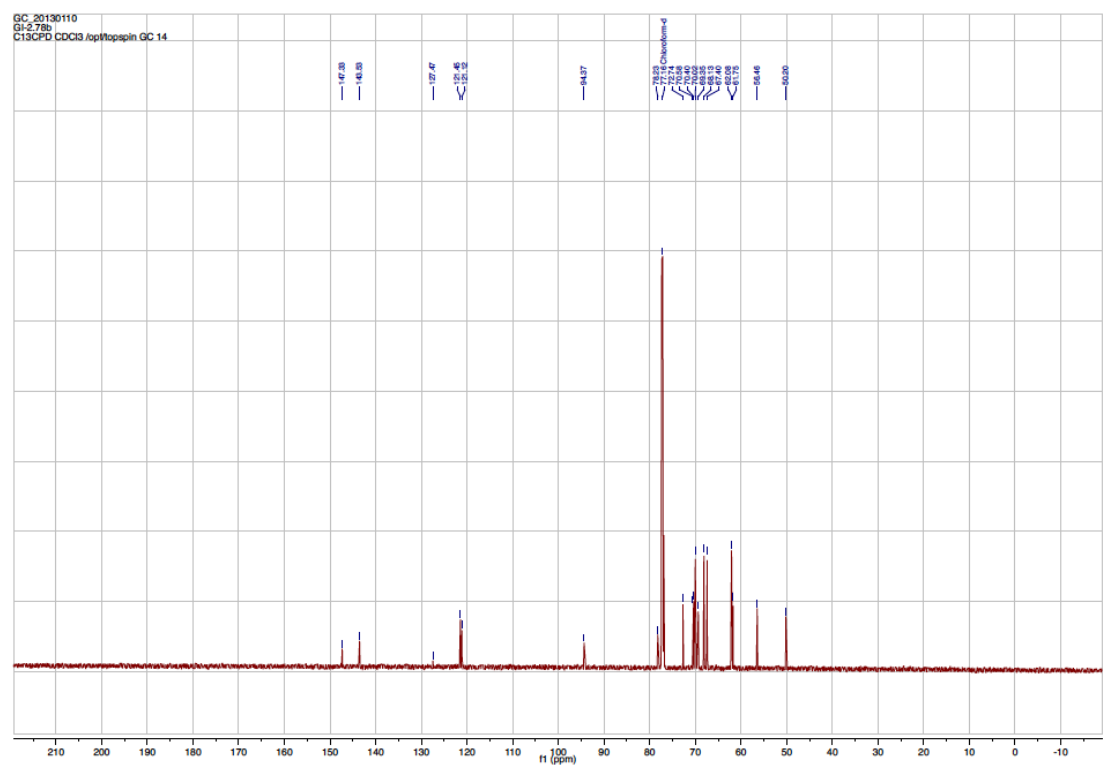

**Figure ESI 20:**  $^1\text{H}$  and  $^{13}\text{C}$  NMR spectra of **17**.

**1-(1-Adamantyl-1H-,1,2,3-triazol-4-yl)-1'-(4-(methyl-1-ol)-1H-1,2,3-triazol-1-yl)-ferrocene 18:**

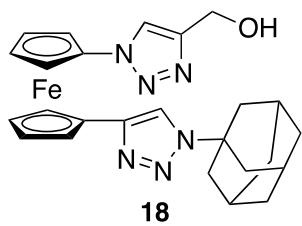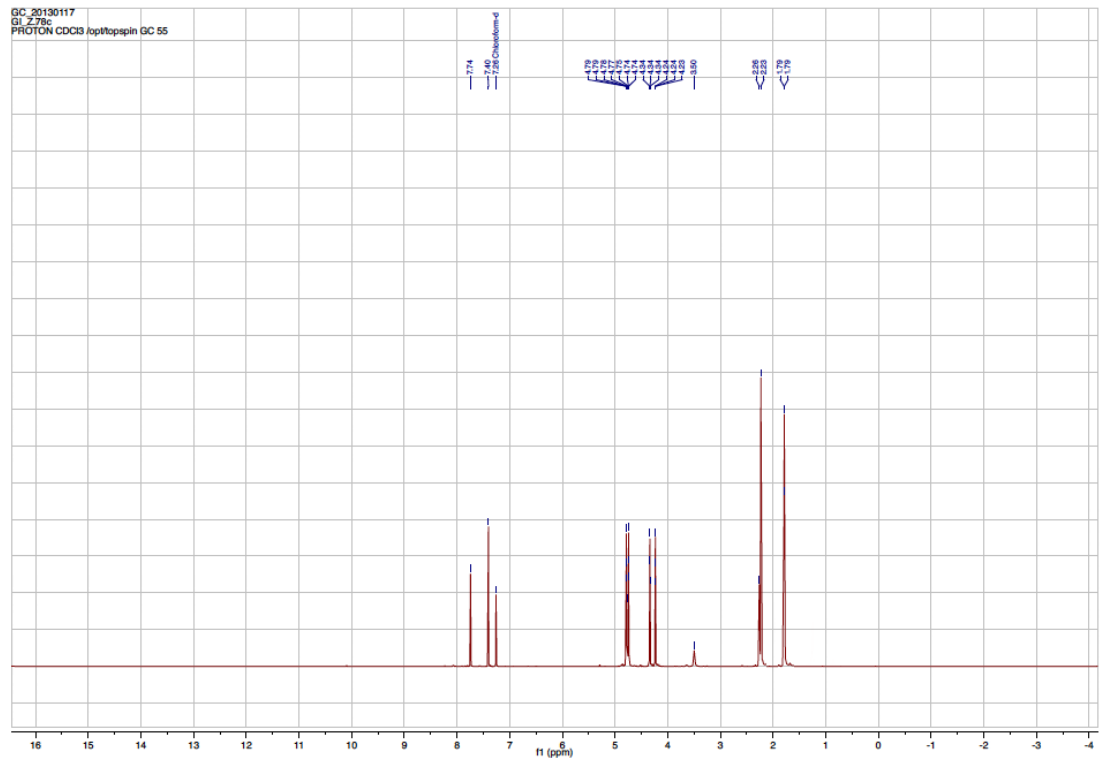

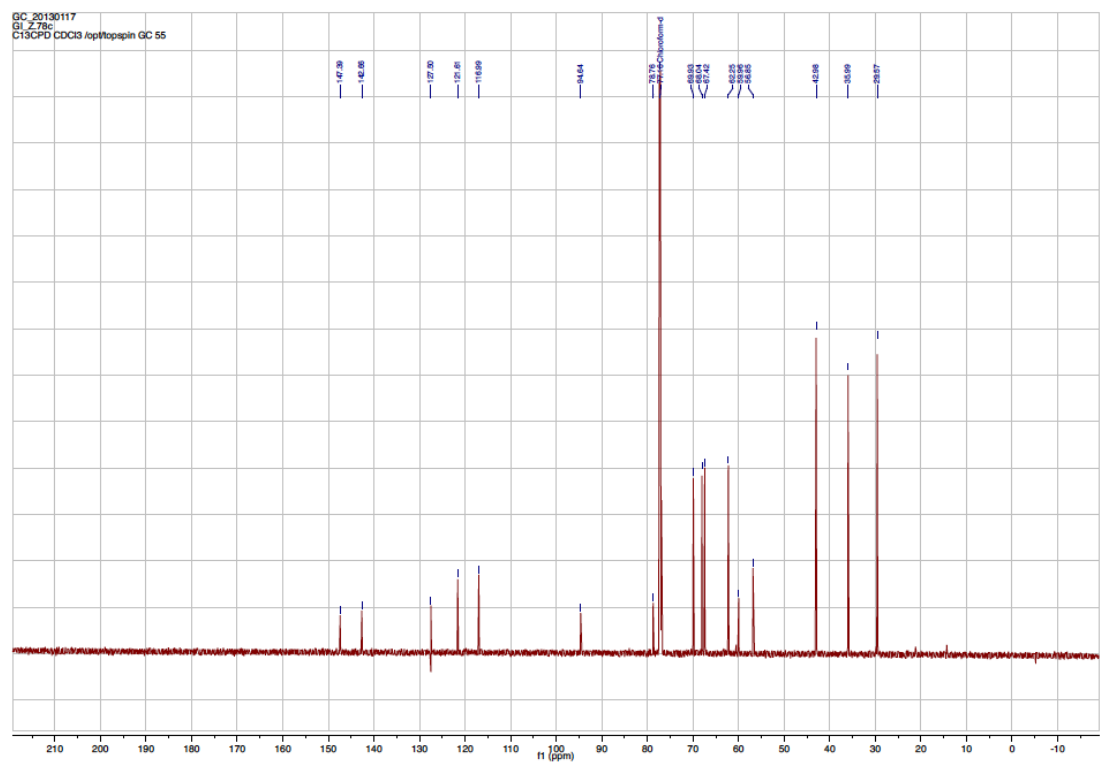

Figure ESI 21:  $^1\text{H}$  and  $^{13}\text{C}$  NMR spectra of **18**.

**1-(1-Benzyl-1H-1,2,3-triazol-4-yl)-1'-(4-(3,5-di-tert-butylphenyl)-1H-1,2,3-triazol-1-yl)-ferrocene 19:**

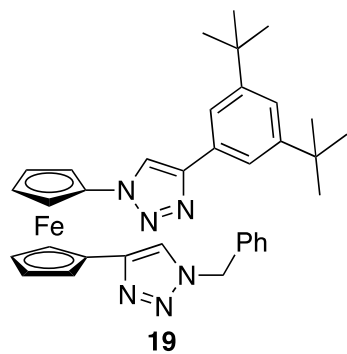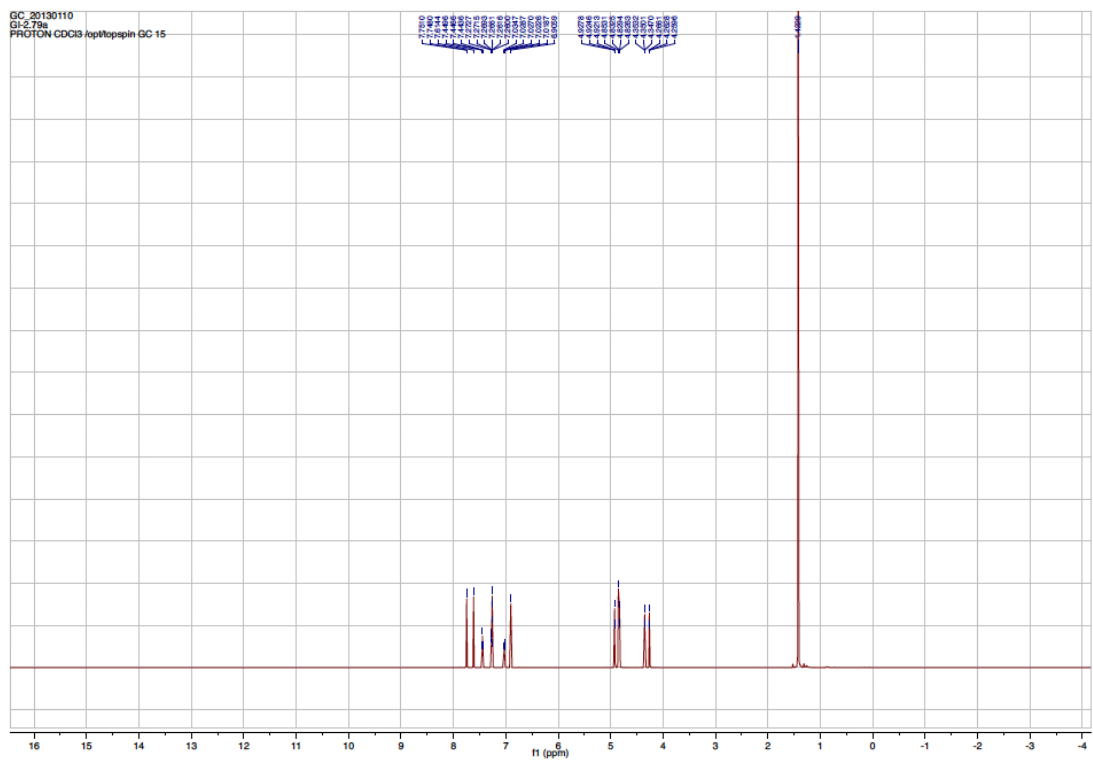



**1-(1-(2-(2-Ethoxyethoxy)ethanol)-1H-1,2,3-triazol-4-yl)-1'-(4-(3,5-di-tert-butylphenyl-1-yl)-1H-1,2,3-triazol-1-yl)-ferrocene 20:**

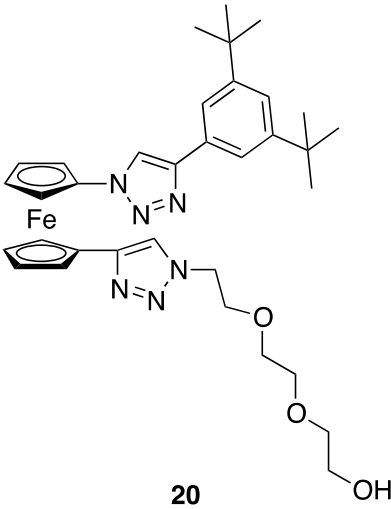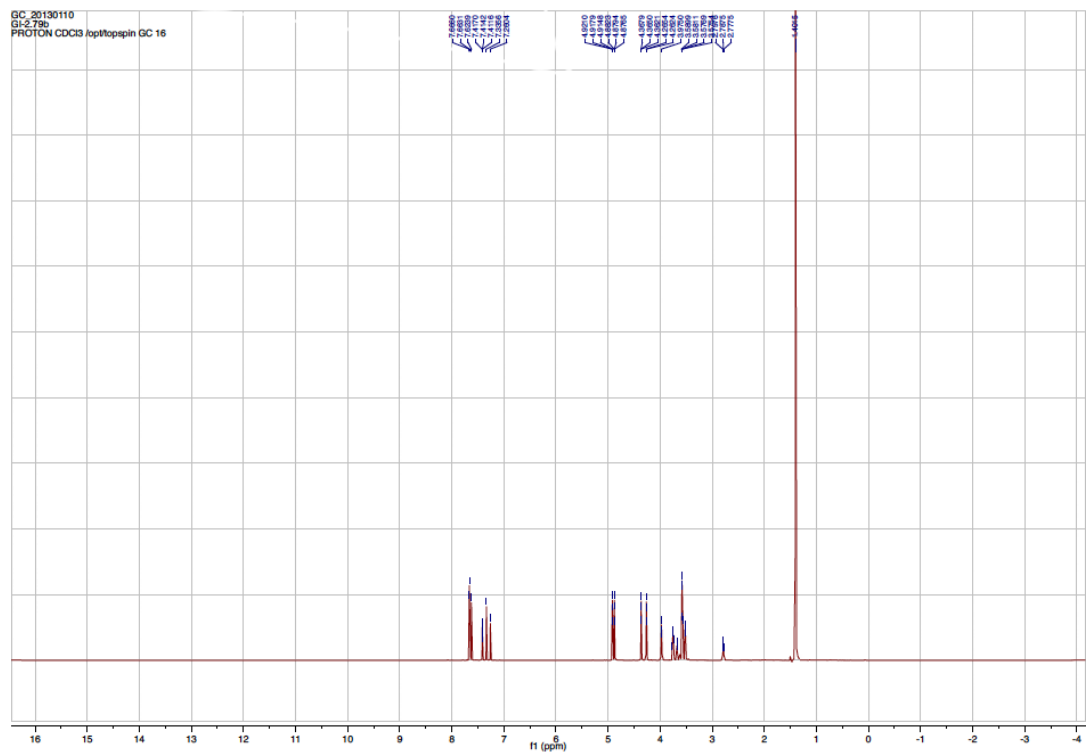

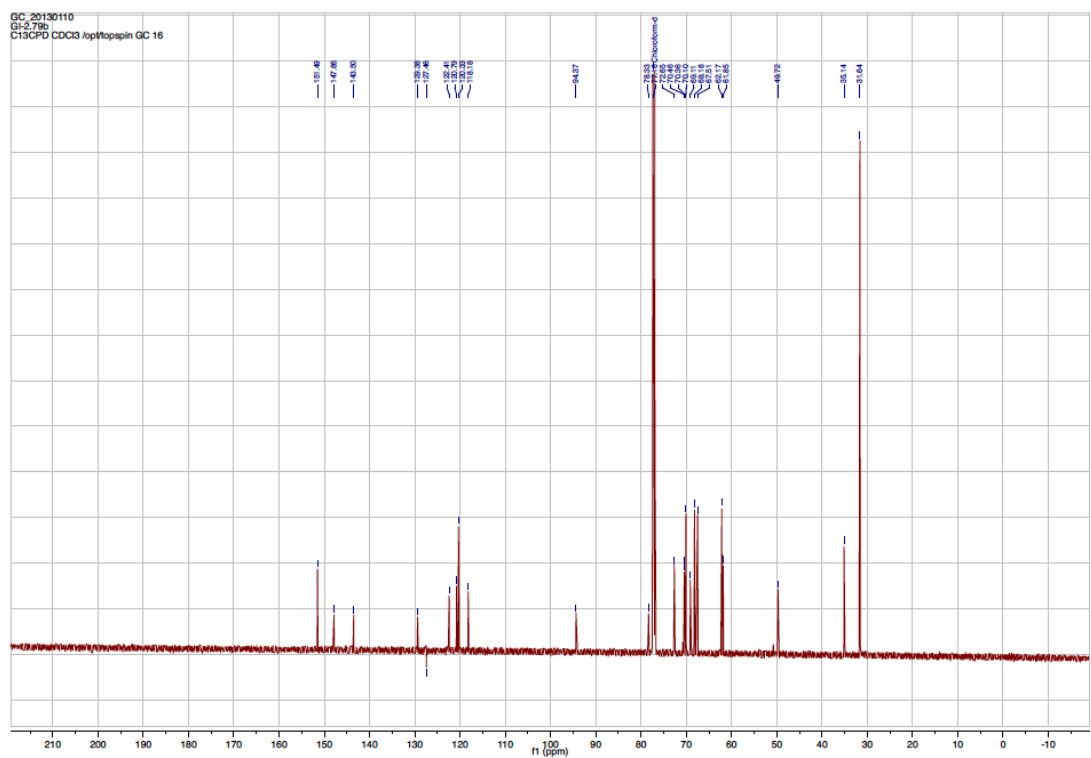

**Figure ESI 23:**  $^1\text{H}$  and  $^{13}\text{C}$  NMR spectra of **20**.

**1-(1-Adamantyl-1H-1,2,3-triazol-4-yl)-1'-(4-(3,5-di-tert-butylphenyl)-1H-1,2,3-triazol-1-yl)-ferrocene 21:**

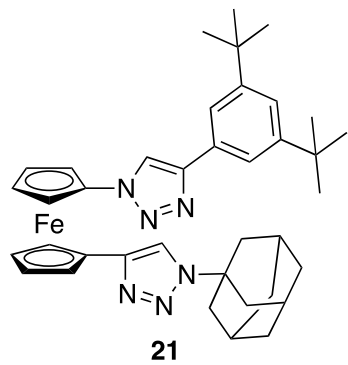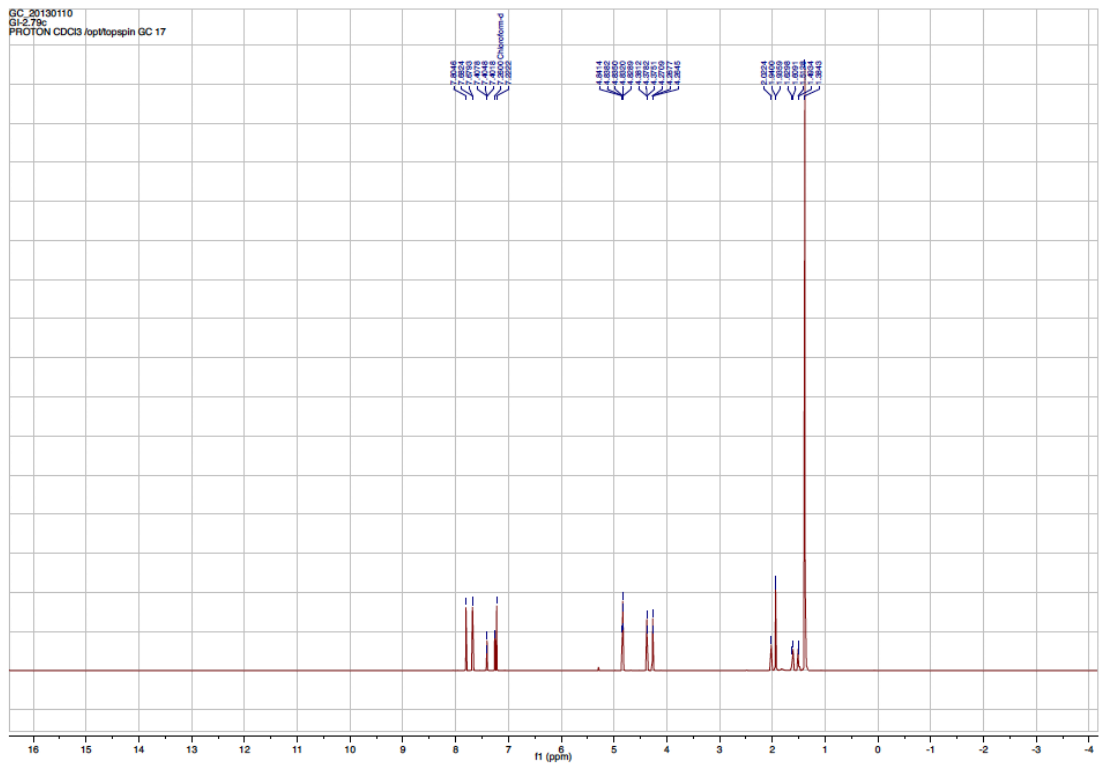

**Figure ESI 24:**  $^1\text{H}$  and  $^{13}\text{C}$  NMR spectra of **21**.

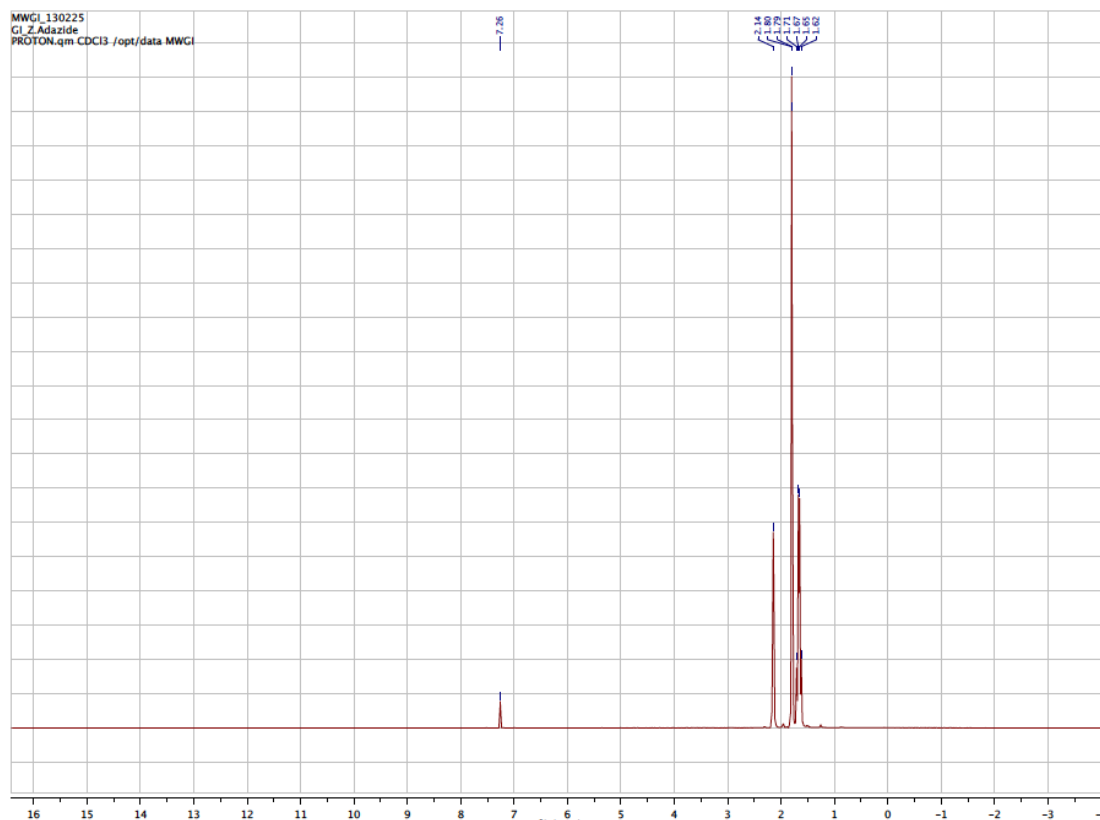

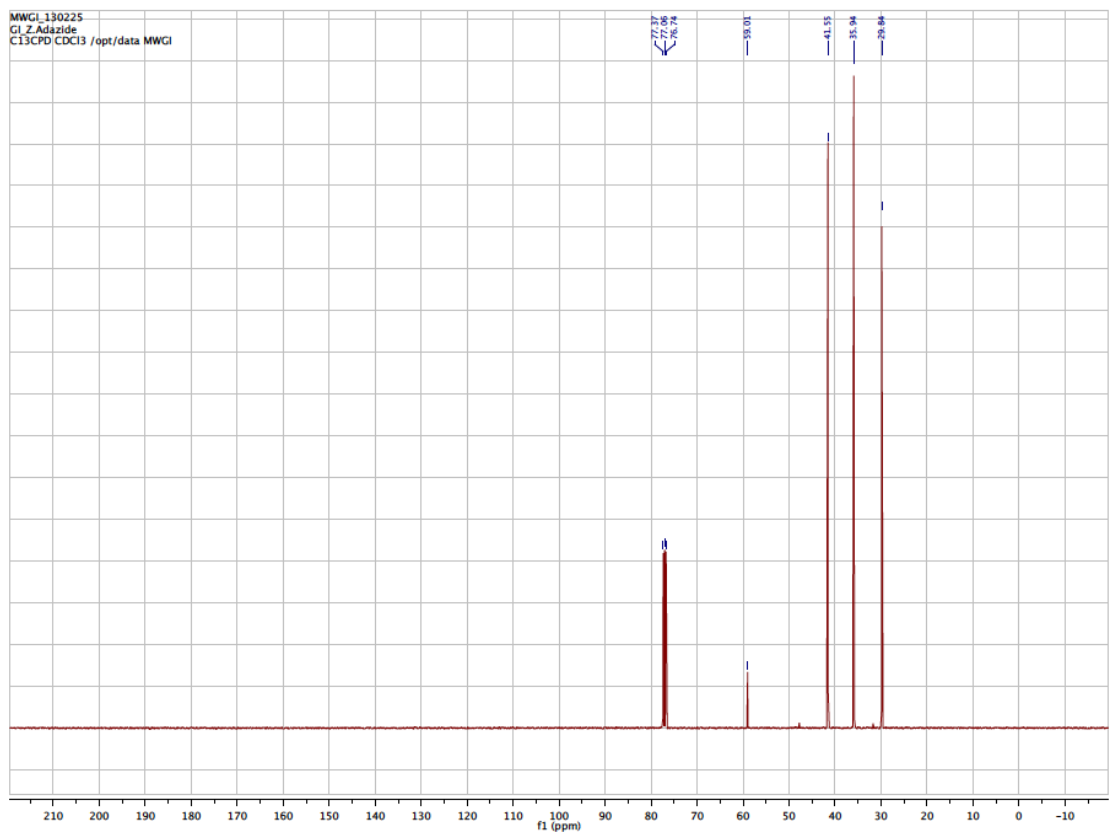

**Figure ESI 25:**  $^1\text{H}$  and  $^{13}\text{C}$  NMR spectra of **28**.

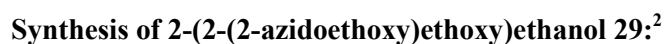

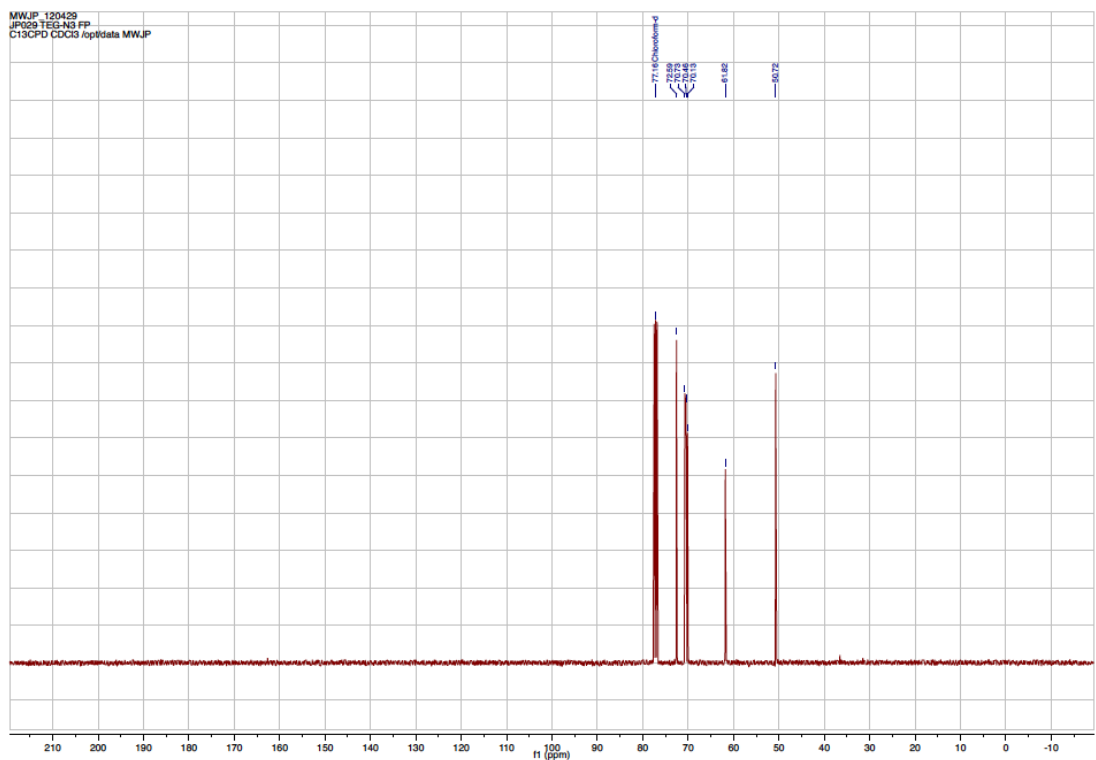

**Figure ESI 26:**  $^1\text{H}$  and  $^{13}\text{C}$  NMR spectra of **29**.

**Synthesis of 3,5-di-tert-butylphenylacetylene **30**:**<sup>3</sup>

Compound **30** was prepared according to a previously reported protocol.<sup>3</sup>

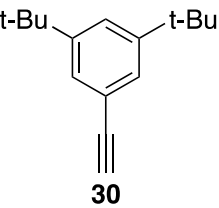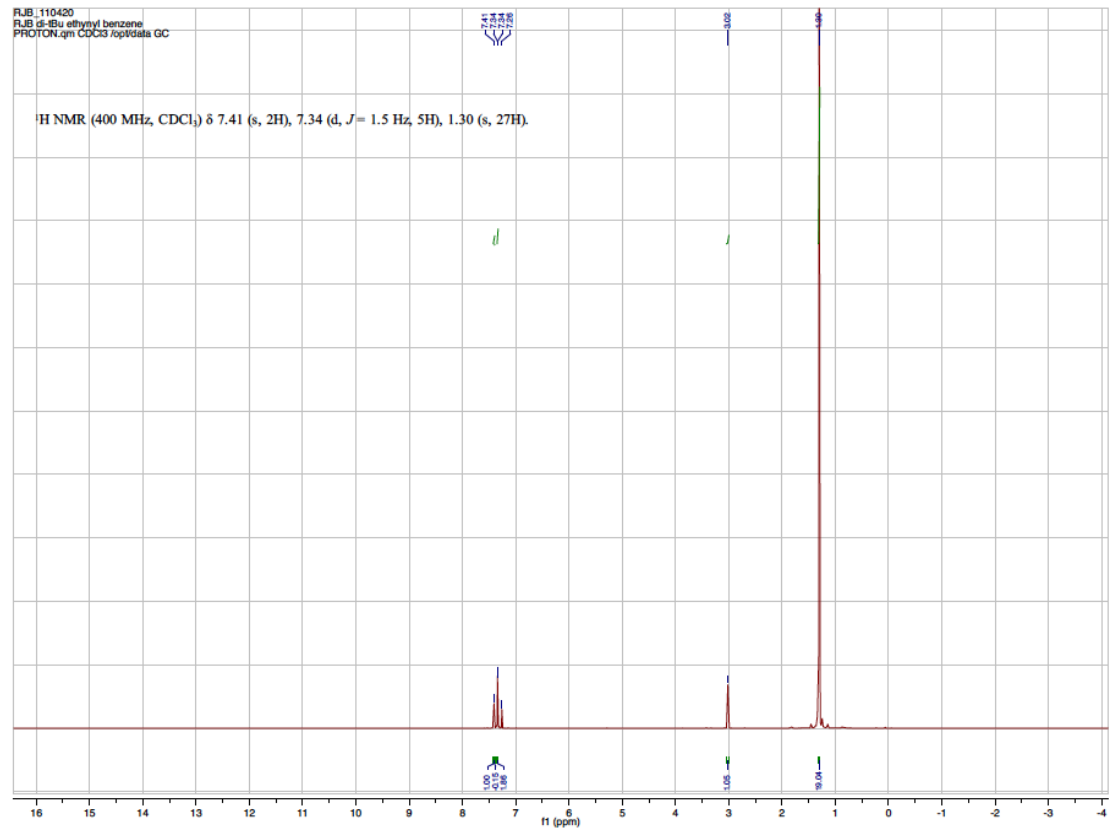

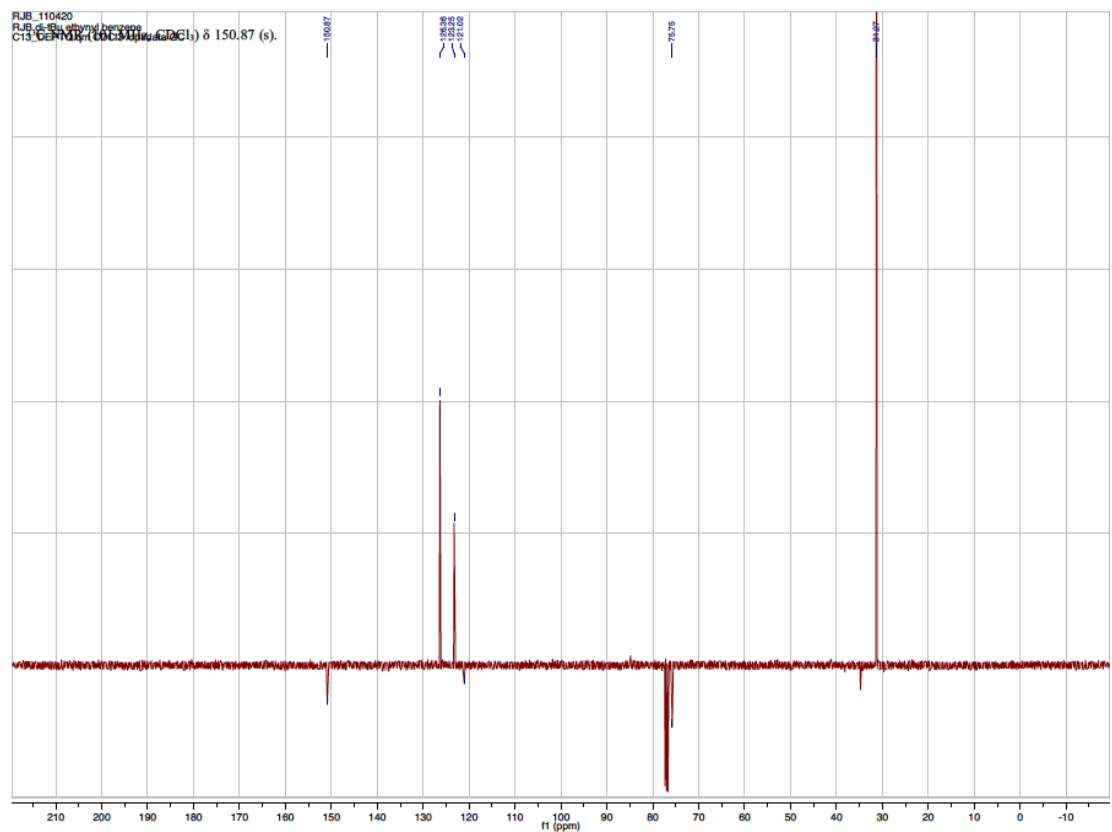

Figure ESI 27: <sup>1</sup>H and <sup>13</sup>C NMR spectra of **30**.

### Isolation of 1-(trimethylsilylethynyl)-ferrocene **31**:

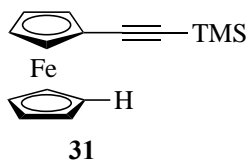

Compound **31** was isolated after flash column chromatography (100% PE) as a side product from the preparation of **8** (above) as yellow solid (113 mg, 44%): m.p. 51-53 °C;  $^1\text{H}$  NMR: 400 MHz,  $\text{CDCl}_3$ :  $\delta_{\text{H}}$  4.43 (s, 2H), 4.19 (s, 5H), 4.17 (s, 2H), 0.22 (s, 9H);  $^{13}\text{C}$  NMR:  $\delta_{\text{C}}$  103.9, 90.4, 71.5, 69.9, 68.5, 64.6, 0.00; IR:  $\nu_{\text{max}}/\text{cm}^{-1}$  3101, 2955, 2924, 2893, 2831, 2147, 1450, 1410, 1320, 1247, 1203, 1103, 1062, 1024, 999, 923, 823, 800, 755; HRMS  $m/z$  calculated for:  $\text{C}_{15}\text{H}_{19}^{54}\text{FeSi}$   $[\text{M}+\text{H}]^+$  281.0647, found 281.0650; LRMS:  $m/z$  283.0  $[\text{M}+\text{H}]^+$ ; UV/vis:  $\lambda_{\text{max}}(\text{DCM})/\text{nm}$  ( $\epsilon / \text{mol}^{-1}\text{cm}^{-1}\text{dm}^3$ ) 243 ( $2.04 \times 10^3$ ), 271 ( $1.61 \times 10^3$ ), 338 (606), 445 (550).

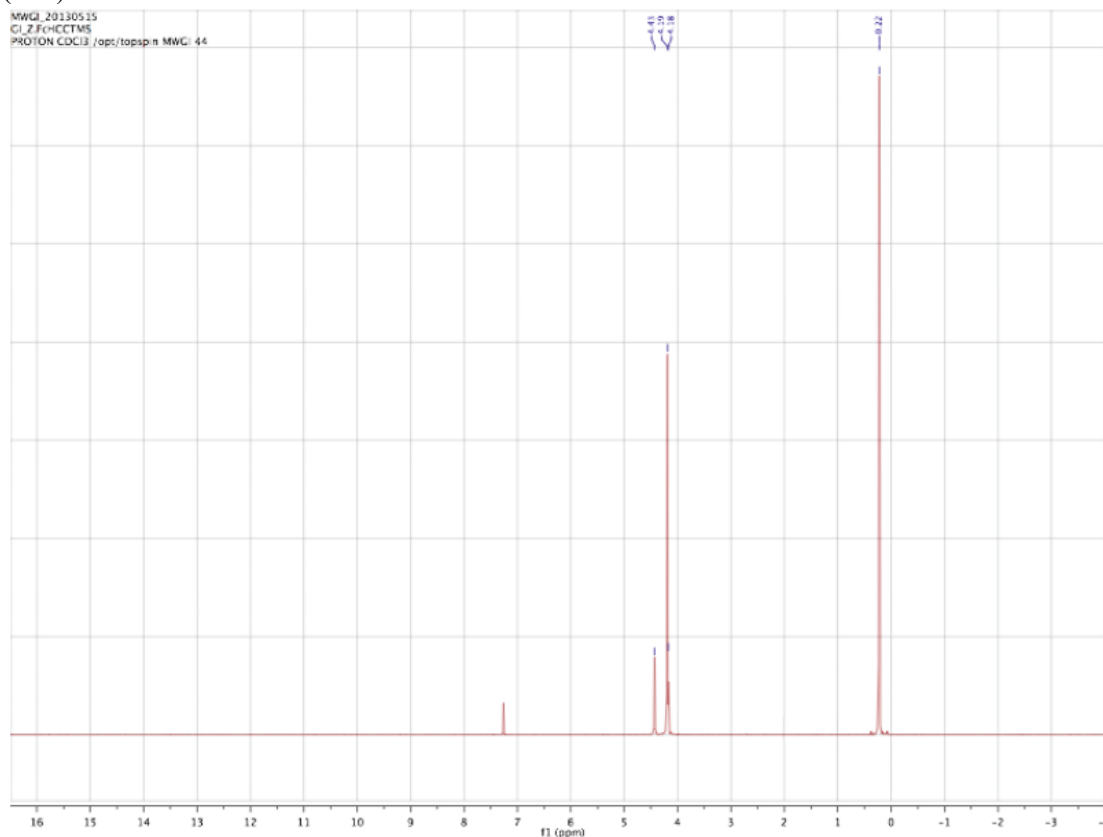

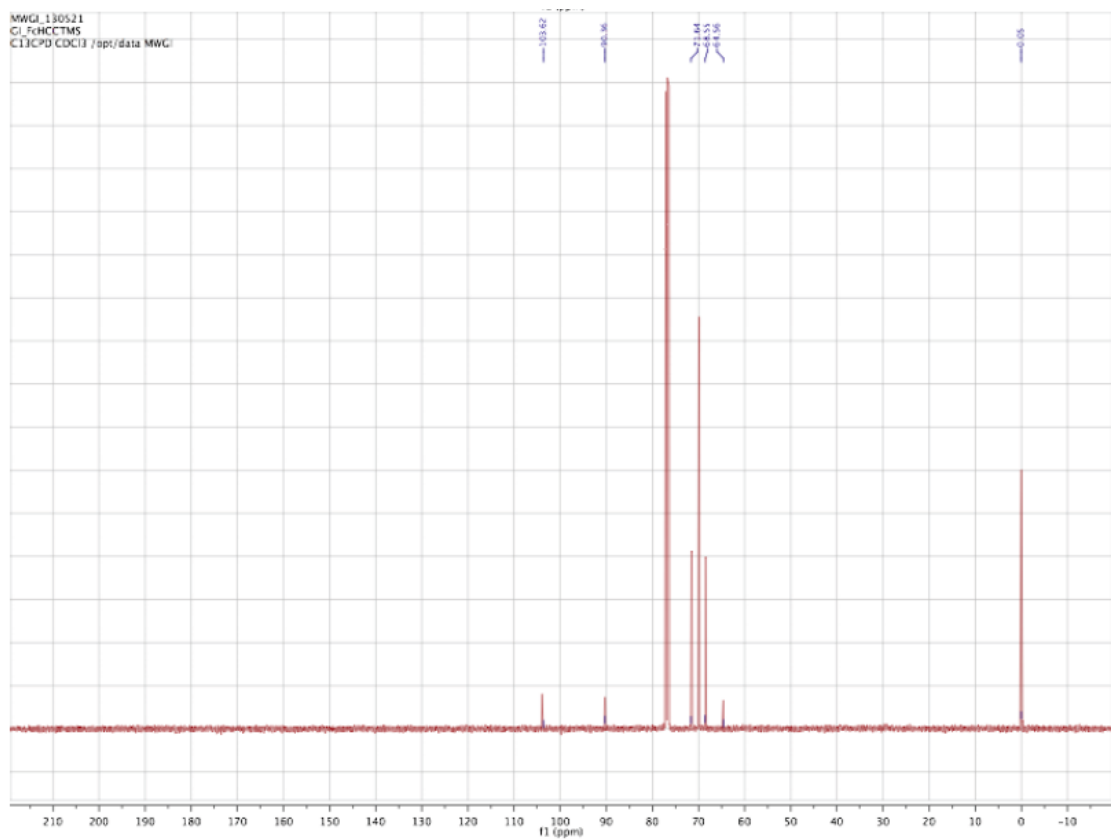

**Figure ESI 28:**  $^1\text{H}$  and  $^{13}\text{C}$  NMR spectrum of **31**.

### Summary of optimisations carried out for the Sonogashira coupling:

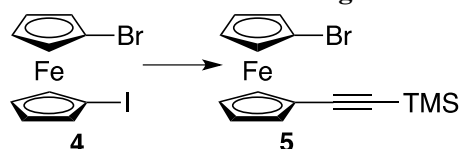

1-Bromo-1'-iodoferrocene **4** (1.0 equiv.), Cu(I) (1-10 mol%), Pd(PPh<sub>3</sub>)Cl<sub>2</sub> (0.5-10 mol%)\* and an additive (1-20 mol%) were dissolved in thoroughly degassed solvent and placed under N<sub>2</sub>. Trimethylsilylacetylene (1.5 equiv.)\*\* was added in one portion and the reaction vessel was sealed and heated at 60-65 °C for up to 48 h. The reaction was cooled to r.t., diluted with Et<sub>2</sub>O and filtered. The filtrate was then washed with aqueous HCl (5%), dried over MgSO<sub>4</sub>, filtered and concentrated *in vacuo*. The product **5** was obtained following purification by flash column chromatography (1% EA in PE) as brown-red solid.

\*We believe that at higher concentrations the aggregation of Pd-black causes the reaction to terminate prematurely.<sup>5</sup> Reducing the catalyst's concentration and adding PPh<sub>3</sub> slows down the unwanted aggregation and thus the reaction proceeds to completion.

\*\* Since the reaction is carried out above the boiling point of trimethylsilylacetylene (53 vs 60-65 °C), an excess of trimethylsilylacetylene is required to compensate for material lost in vapour phase and hence to drive the reaction to completion.

**Table ESI 1:** Summary of screen carried out during the optimisation of Sonogashira coupling.

| Entry | Catalyst (mol%)                                        | Cu(I) (mol%)           | Additive/Ligand (mol%) | Solvent(s) (ratio)                     | Yield <b>4</b> | Recovered <b>5</b> |
|-------|--------------------------------------------------------|------------------------|------------------------|----------------------------------------|----------------|--------------------|
| 1     | Pd(PPh <sub>3</sub> ) <sub>2</sub> Cl <sub>2</sub> (5) | CuI (10)               | -                      | Et <sub>3</sub> N:THF (1:1)            | 15%            | 70%                |
| 2     | Pd(PPh <sub>3</sub> ) <sub>4</sub> (5)                 | CuI (10)               | -                      | Et <sub>3</sub> N:THF (1:1)            | 13%            | 80%                |
| 3     | Pd(PPh <sub>3</sub> ) <sub>2</sub> Cl <sub>2</sub> (5) | CuI (10)               | -                      | <i>i</i> Pr <sub>2</sub> NH:THF (1:1)  | 15%            | 70%                |
| 4     | Pd(PPh <sub>3</sub> ) <sub>4</sub> (5)                 | CuI (10)               | -                      | <i>i</i> Pr <sub>2</sub> NH:THF (1:1)  | 15%            | 70%                |
| 5     | Pd(PPh <sub>3</sub> ) <sub>2</sub> Cl <sub>2</sub> (5) | CuI (10)               | -                      | <i>i</i> Pr <sub>2</sub> NEt:THF (1:1) | 16%            | 70%                |
| 6     | Pd(PPh <sub>3</sub> ) <sub>4</sub> (5)                 | CuI (10)               | -                      | <i>i</i> Pr <sub>2</sub> NEt:THF (1:1) | 10%            | 85%                |
| 7     | Pd(PPh <sub>3</sub> ) <sub>2</sub> Cl <sub>2</sub> (5) | CuCl (10)              | -                      | Et <sub>3</sub> N:THF (1:1)            | 10%            | 85%                |
| 8     | Pd(PPh <sub>3</sub> ) <sub>2</sub> Cl <sub>2</sub> (5) | CuBr (10)              | -                      | Et <sub>3</sub> N:THF (1:1)            | 13%            | 80                 |
| 9     | Pd(PPh <sub>3</sub> ) <sub>2</sub> Cl <sub>2</sub> (5) | CuPF <sub>6</sub> (10) | -                      | Et <sub>3</sub> N:THF (1:1)            | 15%            | 70%                |
| 10    | Pd(PPh <sub>3</sub> ) <sub>2</sub> Cl <sub>2</sub> (5) | CuI (10)               | -                      | Et <sub>3</sub> N:THF (1:1)            | 15%            | 70%                |
| 11    | Pd(PPh <sub>3</sub> ) <sub>2</sub> Cl <sub>2</sub> (5) | CuI (10)               | -                      | Et <sub>3</sub> N:THF (1:2)            | 10%            | 80%                |

|           |                                                             |          |                          |                                |     |     |
|-----------|-------------------------------------------------------------|----------|--------------------------|--------------------------------|-----|-----|
| <b>12</b> | Pd(PPh <sub>3</sub> ) <sub>2</sub> Cl <sub>2</sub><br>(5)   | CuI (10) | -                        | Et <sub>3</sub> N:THF<br>(1:4) | 7%  | 85% |
| <b>13</b> | Pd(PPh <sub>3</sub> ) <sub>2</sub> Cl <sub>2</sub><br>(5)   | CuI (10) | -                        | Et <sub>3</sub> N:THF<br>(2:1) | 20% | 64% |
| <b>14</b> | Pd(PPh <sub>3</sub> ) <sub>2</sub> Cl <sub>2</sub><br>(5)   | CuI (10) | -                        | Et <sub>3</sub> N:THF<br>(4:1) | 40% | 52% |
| <b>15</b> | Pd(PPh <sub>3</sub> ) <sub>2</sub> Cl <sub>2</sub><br>(5)   | CuI (10) | DMEDA<br>(10)            | Et <sub>3</sub> N:THF<br>(4:1) | 30% | 61% |
| <b>16</b> | Pd(PPh <sub>3</sub> ) <sub>2</sub> Cl <sub>2</sub><br>(5)   | CuI (10) | TMEDA<br>(10)            | Et <sub>3</sub> N:THF<br>(4:1) | 15% | 73% |
| <b>17</b> | Pd(PPh <sub>3</sub> ) <sub>2</sub> Cl <sub>2</sub><br>(5)   | CuI (10) | DMDACH<br>(10)           | Et <sub>3</sub> N:THF<br>(4:1) | 23% | 70% |
| <b>18</b> | Pd(PPh <sub>3</sub> ) <sub>2</sub> Cl <sub>2</sub><br>(5)   | CuI (10) | TMDACH<br>(10)           | Et <sub>3</sub> N:THF<br>(4:1) | 33% | 61% |
| <b>19</b> | Pd(PPh <sub>3</sub> ) <sub>2</sub> Cl <sub>2</sub><br>(5)   | CuI (10) | Pyridine<br>(10)         | Et <sub>3</sub> N:THF<br>(4:1) | 15% | 70% |
| <b>20</b> | Pd(PPh <sub>3</sub> ) <sub>2</sub> Cl <sub>2</sub><br>(5)   | CuI (10) | Bipyridine<br>(10)       | Et <sub>3</sub> N:THF<br>(4:1) | 0%  | 97% |
| <b>21</b> | Pd(PPh <sub>3</sub> ) <sub>2</sub> Cl <sub>2</sub><br>(5)   | CuI (10) | PPh <sub>3</sub><br>(20) | Et <sub>3</sub> N:THF<br>(4:1) | 60% | 33% |
| <b>22</b> | Pd(PPh <sub>3</sub> ) <sub>2</sub> Cl <sub>2</sub><br>(1)   | CuI (5)  | PPh <sub>3</sub><br>(10) | Et <sub>3</sub> N:THF<br>(4:1) | 70% | 22% |
| <b>23</b> | Pd(PPh <sub>3</sub> ) <sub>2</sub> Cl <sub>2</sub><br>(0.5) | CuI (1)  | PPh <sub>3</sub><br>(2)  | Et <sub>3</sub> N:THF<br>(4:1) | 85% | <5% |

---

All solvents were dried and thoroughly degassed prior to their use; the reactions were carried out under in hermetically sealed vessels for a period of up to 48 hours; the yields are all isolated; the overall mass recovery was always >90%. (DiMethylEthyleneDiAmine, TetraMethylEthyleneDiAmine, *N,N'*-DiMethylDiaminoCycloHexane, *N,N'*-TetraMethylDiaminoCycloHexane.)



**References:**

1. G. K. S. Prakash, M. A. Stephenson, J. G. Shih and G. A. Olah, *J. Org. Chem.* 1986, **51**, 3215-3217.
2. G. Noble, S. Flitsch, K. P. Liem and S. J. Webb, *Org. Biomol. Chem.* 2009, **7**, 5245-5254.
3. R. S. Stoll, M. V. Peters, A. Kuhn, S. Hecht, S. Heiles, C. M. Thiele, R. Goddard and M. Buehl, *J. Am. Chem. Soc.* 2009, **131**, 357-367.
4. A. Shafir, M. P. Power, G. D. Whitener and J. Arnold, *Organometallics*, 2000, **19**, 3978-3982.
5. A. H. M. de Vries, J. M. C. A. Mulders, J. H. M. Mommers, H. J. W. Henderickx and J. G. de Vries, *Org. Lett.*, 2003, **5**, 3285-3288.
